# Supplementary material
Source: publisher figshare collection journal article supplement (https://acs.figshare.com/ndownloader/files/22767671)
Supplement: Supplementary file 1 [file 22767671]

## Sheet: Sheet1
Rt (min)	Q1	Q3 (Da)	Index	Compounds	Class	ND-1	ND-2	ND-3	ND-4	HFD-1	HFD-2	HFD-3	HFD-4	TAN-1	TAN-2	TAN-3	TAN-4
1.57	293.212	112.8	LIPID-N-0001	13-oxoODE	Eicosanoid	25620	38615	182990	23410	32506	44981	22602	30006	46578	18956	40378	13154
1.61	293.212	185.1	LIPID-N-0002	9-oxoODE	Eicosanoid	11533	28665	117010	7336	14136	12592	6803.3	12685	23113	5742.2	21521	6594.2
1.49	295.227	195.1	LIPID-N-0005	12,13-EpOME	Eicosanoid	90010	149980	278110	56991	70168	103160	48839	59190	86979	42731	93085	34336
1.54	295.227	171.2	LIPID-N-0006	9,10-EpOME	Eicosanoid	137410	207470	373990	110360	133440	169360	79614	150600	147320	83527	127080	52208
2.86	301.217	257.4	LIPID-N-0007	FFA(20:5)	Eicosanoid	2963500	1881800	2672300	2408400	4350900	4639000	4300600	2879200	2575100	2466400	1626500	1229800
1.14	313.238	201	LIPID-N-0009	9,10-DiHOME	Eicosanoid	42613	44601	83134	68371	213330	276960	127050	146620	50501	125830	59974	43212
0.72	317.212	113.2	LIPID-N-0015	15-oxoETE	Eicosanoid	1827800	578070	1683100	1662500	1713700	1583700	953610	917970	1228000	804280	1266900	693160
1.65	319.227	167.2	LIPID-N-0017	11,12-EET	Eicosanoid	195070	437690	360690	298880	69740	102460	46433	131100	106480	98531	72184	37869
1.54	319.227	219.3	LIPID-N-0018	14,15-EET	Eicosanoid	30191	72626	60165	38886	10599	14166	7065.1	10443	16287	10748	13618	7442.2
1.47	319.227	191.2	LIPID-N-0019	5,6-EET	Eicosanoid	8533.2	11948	17288	14732	12334	11576	5933.3	8619.1	13401	13450	7543.7	5094.7
1.71	319.227	155	LIPID-N-0020	8,9-EET	Eicosanoid	14452	16789	26793	6883.8	4046.2	9138.8	4561.8	4447.8	7045.8	5693.5	6442.2	3736.4
1.71	319.227	179	LIPID-N-0021	(±)12-HETE	Eicosanoid	43603	72313	131150	54568	26516	127730	28193	47423	57613	24463	73079	12797
1.55	319.227	219.1	LIPID-N-0022	(±)15-HETE	Eicosanoid	32868	89272	68515	38981	10728	18014	8624.6	11565	18382	15162	14283	10147
1.87	319.227	115	LIPID-N-0026	(±)5-HETE	Eicosanoid	15714	20444	56819	13588	14346	16961	9131.3	10142	19233	10527	10599	5070.9
1.73	319.227	155	LIPID-N-0027	(±)8-HETE	Eicosanoid	7710.1	7078.8	13730	3427.8	3116.8	3883.2	1637.2	2428.5	4405.8	3264.2	3521.3	1797.8
1.65	319.227	167.3	LIPID-N-0029	11(S)-HETE	Eicosanoid	184260	417060	341360	297340	70659	97438	44909	118940	105710	93336	71424	40008
3.38	327.232	283.2	LIPID-N-0033	FFA(22:6)	Eicosanoid	46168	36407	53907	47367	57336	47883	42103	49155	36971	31490	22929	21830
0.83	351.217	233.2	LIPID-N-0052	PGD2	Eicosanoid	13396	19450	14189	60225	5865.2	8899.2	4340.4	27465	11214	14701	5463.3	2347.1
0.83	351.217	271.4	LIPID-N-0053	PGE2	Eicosanoid	18514	22974	27658	75197	6016.6	12320	4592.7	28706	22621	18514	5410.2	5462.7
0.68	87.0446	87.0446	LIPID-N-0072	FFA(4:0)	FFA	121040	188020	113680	84439	128110	144590	186310	144210	261880	146170	90333	152720
0.67	101.06	101.06	LIPID-N-0073	FFA(5:0)	FFA	2806700	2398800	1981900	1362500	1388800	1974900	1014300	819010	1182700	1155600	1444400	1508500
0.73	115.076	115.076	LIPID-N-0074	FFA(6:0)	FFA	278600	277330	339810	369740	243970	285650	441190	257450	350220	351170	311210	232850
0.71	143.107	143.107	LIPID-N-0075	FFA(8:0)	FFA	334480	349120	347250	458690	390190	261690	350590	346350	361820	343990	442420	433480
0.75	171.139	171.139	LIPID-N-0076	FFA(10:0)	FFA	727090	746620	881860	776890	556010	661240	846940	729650	592370	756040	642970	580010
0.75	185.154	185.154	LIPID-N-0077	FFA(11:0)	FFA	184740	279390	189850	261030	149420	271070	203950	179460	197790	223000	195690	257390
0.73	199.17	199.17	LIPID-N-0078	FFA(12:0)	FFA	535410	498360	537540	472600	435170	526650	526470	452710	552740	464580	554340	536460
0.99	213.185	213.185	LIPID-N-0079	FFA(13:0)	FFA	619720	531340	467760	461210	492620	493980	542290	523380	385420	577810	616200	685770
3.39	227.201	227.201	LIPID-N-0080	FFA(14:0)	FFA	2823100	2381100	2670700	1876000	3646400	4460500	5006900	3101300	2980700	2230400	3154500	2346600
3.96	241.217	241.217	LIPID-N-0081	FFA(15:0)	FFA	1981900	1850400	1900300	1643400	1927000	2267300	2584200	1916000	1870200	1113700	1567900	1146600
4.4	255.232	255.232	LIPID-N-0082	FFA(16:0)	FFA	4058100	4074100	4610500	4085900	5226300	5773100	5602000	5528700	5115600	4691300	4263500	3455900
4.76	269.248	269.248	LIPID-N-0083	FFA(17:0)	FFA	1154400	1411700	2021100	1920500	1224000	1118900	903260	1194300	1026700	793720	662950	514750
5.05	283.264	283.264	LIPID-N-0084	FFA(18:0)	FFA	4740800	6354000	6494500	6538700	7055500	7258700	6858600	6861900	6559800	6977600	5400400	4558600
5.61	311.295	311.295	LIPID-N-0085	FFA(20:0)	FFA	203660	100540	159580	142040	250980	189200	224050	227520	158620	130010	108020	126660
7.34	367.358	367.358	LIPID-N-0088	FFA(24:0)	FFA	227500	182520	210570	285860	226960	172780	184130	137880	193180	143450	193030	189450
2.57	225.185	225.185	LIPID-N-0089	FFA(14:1)	FFA	68431	58054	92413	81454	165810	229800	274070	207800	139510	153080	76522	68411
3.62	253.217	253.217	LIPID-N-0091	FFA(16:1)	FFA	2056500	2344500	2282600	1685100	2122400	3707300	4279500	2321300	2061300	850430	2873000	1745800
4.09	267.232	267.232	LIPID-N-0092	FFA(17:1)	FFA	1088800	1397900	1528000	991850	1665900	2103800	2120500	1311100	1471600	655230	1311600	831560
4.47	281.248	281.248	LIPID-N-0093	FFA(18:1)	FFA	3322300	3748900	3782500	3083500	8433900	8868500	8499600	7764400	6744200	4928200	6120800	4923600
4.79	295.264	295.264	LIPID-N-0094	FFA(19:1)	FFA	272780	288250	398640	251240	461570	408450	478620	417840	318100	187240	295410	191680
5.06	309.279	309.279	LIPID-N-0095	FFA(20:1)	FFA	589500	619750	594640	502850	2491900	1576000	1677900	1904100	1505500	994710	1410700	1222700
5.58	337.311	337.311	LIPID-N-0096	FFA(22:1)	FFA	90007	62794	66626	48626	204240	125050	111560	118740	145360	103960	104980	113930
6.21	365.342	365.342	LIPID-N-0097	FFA(24:1)	FFA	33904	67544	64706	70236	113190	83077	97521	82203	67693	104690	90957	85515
2.78	251.201	251.201	LIPID-N-0098	FFA(16:2)	FFA	429350	403820	569520	532660	617540	792910	660160	618910	441900	471030	336430	313070
3.86	279.232	279.232	LIPID-N-0099	FFA(18:2)	FFA	2384200	2345500	2602100	2331400	4314100	4336400	4066300	4041400	3287600	2732000	2876300	2754200
4.62	307.264	307.264	LIPID-N-0100	FFA(20:2)	FFA	536820	460450	489720	337470	1604800	1385400	1404700	1536200	1231000	609880	921990	832460
5.16	335.295	335.295	LIPID-N-0101	FFA(22:2)	FFA	46685	46755	36439	30685	103700	43871	68054	60982	51616	31984	73040	37306
5.67	363.326	363.326	LIPID-N-0102	FFA(24:2)	FFA	18700	57921	44229	40655	33952	44118	47257	32080	22694	23960	36106	26309
3.19	277.217	277.217	LIPID-N-0103	FFA(18:3)	FFA	408950	380790	571650	390340	1041100	1527500	1165700	833530	689310	498110	542770	595710
4.13	305.248	305.248	LIPID-N-0104	FFA(20:3)	FFA	276560	234430	361910	217970	637860	384040	470650	402020	366900	231590	231490	186080
4.8	333.279	333.279	LIPID-N-0105	FFA(22:3)	FFA	161900	150930	172210	95949	502000	210040	216240	238320	200470	130040	177910	166690
2.51	275.201	275.201	LIPID-N-0106	FFA(18:4)	FFA	387880	467890	1046600	422090	885600	1289600	951000	578720	454910	402170	364080	440420
3.71	303.232	303.232	LIPID-N-0107	FFA(20:4)	FFA	8479000	10606000	12570000	13750000	9499100	10597000	8207500	8711200	9150200	7832700	6717900	5266400
4.36	331.264	331.264	LIPID-N-0108	FFA(22:4)	FFA	1119500	1152200	1032800	983360	2260100	1257600	1063900	1125300	1163600	773840	651510	815500
4.9	359.295	359.295	LIPID-N-0109	FFA(24:4)	FFA	78696	105840	122520	70855	88331	57882	80594	92367	85427	82521	75284	61863
3.88	329.248	329.248	LIPID-N-0111	FFA(22:5)	FFA	131410	133230	296830	128820	394130	160840	161890	274960	196420	99020	72944	74662
4.58	357.279	357.279	LIPID-N-0112	FFA(24:5)	FFA	75027	75205	87694	53999	403240	231190	272750	355900	180410	134540	139070	155740
1.7	564.33	279	LIPID-N-0129	LPC(18:2/0:0)	LPC	976260	1120900	1495600	1205300	2006300	1596600	2142700	1699200	1812700	1316400	1446000	1199400
4.65	508.34	311	LIPID-N-0142	LPE(0:0/20:0)	LPE	13187	13806	9553	9814.6	27420	24365	27279	18211	22725	14654	21480	20118
1.67	450.262	253	LIPID-N-0145	LPE(0:0/16:1)	LPE	126550	150100	160400	95225	62671	70015	88128	62179	83464	41713	86728	70130
1.37	498.262	301	LIPID-N-0154	LPE(0:0/20:5)	LPE	23507	34898	42803	35115	55467	35400	62531	37394	40371	29552	39334	20030
2.32	541.241	225	LIPID-N-0158	LPI(14:1/0:0)	LPI	54049	56637	79021	46685	74031	52244	59879	40967	55843	44963	50729	47916
6.54	701.52	255	LIPID-N-0172	PA(16:0/20:1)	PA	39109	70417	40630	97663	73710	72002	78066	114400	107010	55169	53719	36794
7.8	729.551	309	LIPID-N-0173	PA(20:1/18:0)	PA	6697.7	4875.5	8657.7	3990.7	20052	12696	17371	19757	10194	14798	10237	11188
7.83	729.551	281	LIPID-N-0174	PA(18:1/20:0)	PA	23541	33040	44595	30570	87541	73142	83058	123420	62548	61385	47085	45572
6	750.529	227	LIPID-N-0178	PC(16:0/14:0)	PC	47027	47433	53441	61157	46358	50348	32303	33844	44017	33284	30995	33070
6.69	778.56	255	LIPID-N-0179	PC(16:0/16:0)	PC	2541200	3152400	3023600	3563600	2758100	2128300	2121000	2460800	2953600	2191600	2106300	1693100
6.05	776.544	255	LIPID-N-0188	PC(16:0/16:1)	PC	300670	291510	436510	282570	207000	211990	277590	218430	250330	177250	268210	182840
6.16	776.544	283	LIPID-N-0190	PC(18:0/14:1)	PC	108420	118350	245480	120730	46208	70966	37022	51406	60261	55087	53254	39981
6.82	804.575	253	LIPID-N-0193	PC(16:1/18:0)	PC	154890	196430	408850	170670	107350	108810	162380	166670	137660	99103	126280	91269
7.75	832.607	255	LIPID-N-0198	PC(16:0/20:1)	PC	30738	39914	52456	36605	62138	30835	40626	50130	40774	31135	35562	40584
5.62	774.529	253	LIPID-N-0212	PC(16:1/16:1)	PC	118190	84809	142400	58701	31559	49911	86135	52275	47817	37604	74285	69892
5.73	774.529	281	LIPID-N-0213	PC(18:1/14:1)	PC	107940	108920	83038	110920	290200	266210	261210	370510	171330	240020	156190	182890
6.14	802.56	253	LIPID-N-0216	PC(16:1/18:1)	PC	134940	135470	162050	105150	135990	136330	213250	212790	135450	127780	147190	156080
6.81	830.591	281	LIPID-N-0223	PC(18:1/18:1)	PC	369740	349530	557160	344270	986630	609350	868680	1131200	672140	491870	635200	596900
6.87	830.591	307	LIPID-N-0225	PC(16:0/20:2)	PC	50173	37010	45931	27858	38442	20449	39751	41587	45880	36725	58033	55922
7.82	858.622	281	LIPID-N-0229	PC(18:1/20:1)	PC	22051	22048	32340	14780	48916	26810	29996	41518	23074	21256	28076	22208
8.05	858.622	307	LIPID-N-0235	PC(18:0/20:2)	PC	44580	47211	77944	47179	34107	29698	40341	56060	49955	39150	45492	36492
5.42	772.513	279	LIPID-N-0240	PC(14:1/18:2)	PC	13807	28604	28806	19937	54326	58579	51288	76440	42855	50774	40894	37053
5.71	800.544	253	LIPID-N-0244	PC(16:1/18:2)	PC	467040	278280	375910	291710	278300	323930	435240	351740	316770	312320	313690	328640
5.89	800.544	277	LIPID-N-0246	PC(16:0/18:3)	PC	250070	431600	547620	378020	316490	265720	339370	403120	200310	271200	252040	243470
6.29	828.575	279	LIPID-N-0253	PC(18:1/18:2)	PC	1499500	1380500	1573200	1136600	1840000	1623200	2178800	2399200	1659200	1433900	1940800	1834500
6.58	828.575	277	LIPID-N-0255	PC(18:0/18:3)	PC	38306	92634	138060	78194	64142	65232	93296	91800	68467	52425	75607	54083
7.31	856.607	283	LIPID-N-0256	PC(18:0/20:3)	PC	204120	269540	422740	233710	502170	402670	448140	527340	393390	442700	337330	335960
5.46	798.529	253	LIPID-N-0271	PC(16:1/18:3)	PC	13566	13284	19989	14529	6037.5	6537.9	12142	9666	5875.4	5166	10995	13581
5.84	826.56	305	LIPID-N-0283	PC(16:1/20:3)	PC	3745.5	11563	16481	15180	16921	15995	26433	31477	31427	24670	24519	26309
6.58	854.591	255	LIPID-N-0289	PC(22:4/16:0)	PC	35862	40306	79605	42648	30843	11531	22292	24812	31206	29116	31918	31394
6.47	854.591	281	LIPID-N-0290	PC(20:3/18:1)	PC	63650	55913	91679	38297	86088	55636	95707	104110	71416	73112	104940	94428
5.62	824.544	303	LIPID-N-0304	PC(20:4/16:1)	PC	378680	342900	491120	321240	173850	137100	211400	178770	213560	213540	232900	133520
5.75	824.544	301	LIPID-N-0305	PC(16:0/20:5)	PC	123950	89577	126340	96640	187380	154540	170000	182250	165570	157430	154520	123540
5.49	824.544	277	LIPID-N-0309	PC(18:2/18:3)	PC	13520	16090	26216	14932	22138	20321	30068	32721	15229	19738	19789	27024
6.14	852.575	281	LIPID-N-0312	PC(18:1/20:4)	PC	901120	896940	796290	730450	420980	461910	477180	526900	519930	359380	395880	356320
5.89	852.575	305	LIPID-N-0318	PC(18:2/20:3)	PC	19887	17937	33347	14038	36978	42552	89866	56399	47389	47739	35255	60210
6.83	880.607	309	LIPID-N-0320	PC(20:1/20:4)	PC	30822	26927	15941	23352	16128	9187.6	14535	13894	14244	18270	18753	10123
5.92	850.56	327	LIPID-N-0337	PC(16:0/22:6)	PC	1563000	1463700	2048600	1550200	1150200	794520	614000	1078600	1002300	1062600	832810	718980
5.79	850.56	301	LIPID-N-0341	PC(18:1/20:5)	PC	23126	9257.7	15390	7943.3	26305	15340	22054	30587	14632	15731	20360	10212
6.64	878.591	327	LIPID-N-0344	PC(18:0/22:6)	PC	700580	1000600	1187200	892580	533060	520910	348340	508800	411570	602880	258100	297890
5.83	876.575	303	LIPID-N-0355	PC(20:3/20:4)	PC	32117	31674	25180	25668	32377	17185	33524	31381	32007	24844	17111	22603
6	876.575	327	LIPID-N-0357	PC(18:1/22:6)	PC	161680	171280	169480	161400	75996	61102	67108	78097	77551	44116	62587	67327
6.31	662.476	227	LIPID-N-0362	PE(16:0/14:0)	PE	17147	18274	35185	7339	9750.1	7386.2	14182	11594	15816	11439	9442.5	10358
7.06	690.507	255	LIPID-N-0363	PE(16:0/16:0)	PE	243990	321790	292570	445110	230700	190320	237200	261460	346590	215010	181840	149600
8.1	718.539	255	LIPID-N-0366	PE(16:0/18:0)	PE	92244	106070	142400	144840	85197	83934	101240	104600	130550	85591	66420	69517
6.2	688.492	253	LIPID-N-0373	PE(16:1/16:0)	PE	1808100	1678500	2042800	1338900	873500	801230	1481800	975020	848950	545730	720540	622510
6.18	688.492	281	LIPID-N-0376	PE(14:0/18:1)	PE	14400	18619	17849	13750	52799	51666	81443	41964	26813	16693	33395	27846
6.98	716.523	281	LIPID-N-0377	PE(18:1/16:0)	PE	8713800	7515800	8322300	7707600	12314000	6854200	10994000	12010000	6039400	6370800	4835800	4449600
8.2	744.554	281	LIPID-N-0381	PE(18:1/18:0)	PE	1190100	1135800	1464300	1134000	2515800	1306200	1829800	2930400	1076400	1241100	802670	898260
8.07	744.554	255	LIPID-N-0383	PE(20:1/16:0)	PE	27084	29306	28736	32498	48740	23890	45654	53080	53293	30779	40157	29157
10.14	800.617	281	LIPID-N-0396	PE(22:0/18:1)	PE	10924	12496	16868	10820	15364	10074	11902	14619	13562	7963.9	8838.8	6627.6
10.45	828.648	281	LIPID-N-0400	PE(24:0/18:1)	PE	9161.4	8005.4	14039	9860.7	9404.2	7202.6	7858.3	8742.6	8826.9	6096	5495.8	4671.2
5.71	686.476	253	LIPID-N-0403	PE(16:1/16:1)	PE	65630	37711	66964	31131	13982	14606	28127	13743	6563.5	11082	11794	11895
6.39	714.507	253	LIPID-N-0406	PE(18:1/16:1)	PE	337620	286300	477950	237570	228530	165120	457810	365050	203050	158580	228100	207030
6.47	714.507	279	LIPID-N-0407	PE(18:2/16:0)	PE	33416000	26589000	30481000	25946000	37938000	35303000	42655000	46711000	33339000	28068000	24768000	23960000
7.07	742.539	281	LIPID-N-0409	PE(18:1/18:1)	PE	1324700	1314600	1553600	1122800	3472400	1533900	3407800	4190200	1511400	1503700	1326800	1692700
7.26	742.539	283	LIPID-N-0410	PE(18:0/18:2)	PE	3918900	3404200	4115700	3356400	8633600	6475700	8023600	10793000	5825400	6336600	4338700	4948400
7.14	742.539	307	LIPID-N-0413	PE(20:2/16:0)	PE	94263	86394	104220	75938	67201	35577	56650	83070	78753	63613	62628	53336
7.1	742.539	253	LIPID-N-0415	PE(20:1/16:1)	PE	13599	11342	23089	6244.4	11459	9953.3	18091	11649	10481	8085	11798	7053.7
8.38	770.57	307	LIPID-N-0418	PE(20:2/18:0)	PE	56690	42293	63624	42113	29610	21220	39068	49788	47141	36945	38215	44378
8.14	770.57	309	LIPID-N-0420	PE(20:1/18:1)	PE	12228	14409	15941	11719	49272	15727	30078	41292	27531	19474	21457	19725
8.33	770.57	279	LIPID-N-0423	PE(20:0/18:2)	PE	43083	29878	27363	27260	76309	45776	74993	74564	54663	57090	46262	60443
9.82	798.601	279	LIPID-N-0429	PE(22:0/18:2)	PE	7073.1	8867.7	7296.1	8398.9	9614.8	8482	9644.5	15150	9369.6	9291.9	6848.1	6924.1
5.93	712.492	255	LIPID-N-0439	PE(18:3/16:0)	PE	417120	596450	597670	500290	289100	334100	407280	326680	299140	207230	202900	233190
5.85	712.492	279	LIPID-N-0440	PE(16:1/18:2)	PE	655450	411410	439070	410120	290940	306340	533740	387860	274370	241140	385540	273080
6.4	740.523	279	LIPID-N-0442	PE(18:1/18:2)	PE	6616900	5673200	7418400	4924100	12336000	8057100	15039000	15308000	10142000	7695400	8384500	8604200
6.36	740.523	255	LIPID-N-0443	PE(16:0/20:3)	PE	1606300	1714700	1734200	1603400	1872800	1489800	1608600	1529900	1613700	1293800	1330800	1088900
6.68	740.523	283	LIPID-N-0444	PE(18:0/18:3)	PE	68890	109150	135390	95441	135840	99340	151050	164570	64009	75183	40599	60313
7.56	768.554	305	LIPID-N-0449	PE(20:3/18:0)	PE	499380	485460	557570	524590	703780	623410	589040	629480	558260	637800	421310	373820
7.26	768.554	279	LIPID-N-0454	PE(20:1/18:2)	PE	73469	55175	63352	49258	128030	61282	119700	132950	93898	66274	80346	95353
5.68	710.476	303	LIPID-N-0462	PE(20:4/14:0)	PE	38489	19260	31678	10946	16062	7080.3	21951	16814	16086	13968	13472	8148.1
5.99	738.507	279	LIPID-N-0467	PE(18:2/18:2)	PE	733760	379640	518480	560190	857250	500110	1057100	999910	656820	706630	552470	651820
6	738.507	277	LIPID-N-0468	PE(18:3/18:1)	PE	61611	56588	99688	31106	61008	55875	93610	79495	50079	54272	46251	48908
6.67	766.539	305	LIPID-N-0473	PE(18:1/20:3)	PE	187280	182630	213290	115620	321500	199230	363490	467840	248900	213430	327230	271000
6.84	766.539	255	LIPID-N-0474	PE(16:0/22:4)	PE	157000	177360	176250	137780	133760	69427	74314	88147	112040	95359	77898	98774
6.78	766.539	279	LIPID-N-0475	PE(18:2/20:2)	PE	64335	34640	48915	35787	71203	50222	76523	119690	64611	58116	71301	94931
7.12	766.539	283	LIPID-N-0478	PE(20:4/18:0)	PE	7289400	6858300	8146100	6349300	9752400	9045100	7214800	8805400	7782700	9054500	5608600	6050200
7.07	794.57	303	LIPID-N-0485	PE(20:4/20:0)	PE	26317	18482	17063	22792	39952	21169	27619	25469	29642	24336	22533	24233
5.73	736.492	253	LIPID-N-0490	PE(16:1/20:4)	PE	257170	338010	408720	251880	126370	91966	140970	116740	89816	84515	123900	91749
5.9	736.492	301	LIPID-N-0493	PE(16:0/20:5)	PE	316070	201910	350350	302670	388220	309340	486410	327300	414710	249980	323710	233690
5.6	736.492	279	LIPID-N-0494	PE(18:2/18:3)	PE	18827	16190	16587	14678	8150.8	19814	40632	24958	17558	25147	21366	28853
6.32	764.523	303	LIPID-N-0497	PE(18:1/20:4)	PE	7451300	6875800	7528400	5736900	6636500	4382800	7824500	6581300	6051100	4340400	5996400	4384700
6.1	764.523	301	LIPID-N-0499	PE(18:0/20:5)	PE	246050	155150	244680	183160	334100	348080	423290	335890	270940	404720	216470	192450
6.87	792.554	331	LIPID-N-0502	PE(22:4/18:1)	PE	30448	30759	46039	21614	28574	11585	19106	26304	20746	15064	22534	20136
7.09	792.554	303	LIPID-N-0507	PE(20:1/20:4)	PE	238850	191780	175980	135810	222490	151820	201010	203960	196290	171480	227790	235030
5.95	762.507	301	LIPID-N-0522	PE(20:5/18:1)	PE	84123	70235	118030	92697	140330	86395	154980	149990	127640	76302	145960	79316
6.1	762.507	255	LIPID-N-0525	PE(22:6/16:0)	PE	9169600	6782000	12322000	7762300	7706300	5451300	4644700	5982300	5982300	6458300	4811800	5136400
5.88	762.507	303	LIPID-N-0527	PE(18:2/20:4)	PE	307360	314530	253950	272530	359360	260640	415950	350060	304630	339970	266450	230610
6.59	790.539	303	LIPID-N-0530	PE(20:2/20:4)	PE	63414	131370	102700	95923	110010	78213	72325	111740	95917	96140	45718	52262
6.85	790.539	327	LIPID-N-0531	PE(22:6/18:0)	PE	4611400	5134400	6585100	5066000	5301800	4491300	3072500	5447500	3887100	5222900	3330400	3236100
7.74	818.57	303	LIPID-N-0535	PE(20:4/22:2)	PE	35934	43021	56493	42990	46728	36894	43055	52204	50088	39015	23572	23641
5.62	760.492	327	LIPID-N-0538	PE(16:1/22:6)	PE	92219	82734	148760	85520	18626	15015	28761	16211	30027	32482	37013	28248
6.12	788.523	327	LIPID-N-0543	PE(22:6/18:1)	PE	925620	1033100	1211500	850680	490640	398600	554270	610790	560800	424210	518550	434360
6.04	788.523	303	LIPID-N-0546	PE(20:3/20:4)	PE	18412	33690	26397	37022	33525	28588	35109	26798	39573	25613	17200	27673
6.92	816.554	327	LIPID-N-0548	PE(22:6/20:1)	PE	51964	61571	69891	54396	42233	31301	33488	40895	32783	32161	52046	57337
5.68	745.502	279	LIPID-N-0562	PG(18:2/16:0)	PG	60402	63073	86941	74031	54299	44870	66758	42297	68598	47581	37030	36256
5.64	745.502	281	LIPID-N-0563	PG(18:1/16:1)	PG	12049	12077	14285	11141	12319	18427	22583	29628	17320	15761	20850	15250
6.08	773.533	281	LIPID-N-0567	PG(18:1/18:1)	PG	54615	87557	71882	67729	216290	209520	192880	263270	108570	178060	118430	117130
6.22	773.533	279	LIPID-N-0568	PG(18:2/18:0)	PG	44779	53824	47502	51472	95488	87987	68859	76321	38604	45024	48998	24709
6.07	773.533	307	LIPID-N-0571	PG(16:0/20:2)	PG	4246.2	3612.5	4799.8	4879.9	9560.1	6423.2	5978.2	4296.6	15059	13318	10840	21071
5.4	771.518	279	LIPID-N-0582	PG(18:2/18:1)	PG	13259	21120	19840	12525	34790	48513	52303	39184	33441	34661	20262	27999
5.02	791.486	253	LIPID-N-0625	PG(16:1/22:6)	PG	12139	11051	16828	10803	11471	8927.5	13959	16003	8826.8	5427.9	10808	11126
5.29	819.518	327	LIPID-N-0628	PG(22:6/18:1)	PG	8093.1	9796.4	13030	4821.9	14615	17410	26045	24075	15974	12688	14927	12496
6.25	861.549	283	LIPID-N-0640	PI(18:2/18:0)	PI	44235	53818	40373	49305	58123	59466	61502	52687	28960	33583	58213	69717
6.31	887.565	305	LIPID-N-0644	PI(20:3/18:0)	PI	54861	38462	42838	34917	415380	315320	415890	375290	228040	252740	242990	269900
5.51	857.518	255	LIPID-N-0649	PI(20:4/16:0)	PI	106060	131780	119930	93565	112830	120480	105630	111820	173180	93305	160700	142280
6.01	885.549	283	LIPID-N-0653	PI(18:0/20:4)	PI	847180	858430	864570	686110	1368900	1081600	908360	1035200	974930	920950	904640	1061400
5.55	883.534	303	LIPID-N-0664	PI(18:1/20:4)	PI	20018	10878	15588	5545.1	22031	15669	21385	14381	19941	14386	31967	20243
5.66	808.521	281	LIPID-N-0706	PS(18:1/20:4)	PS	21658	18328	17321	9543.1	33249	24028	25136	22268	26760	23977	19572	29324
0.725	162.113	85.1	LIPID-P-0001	Free carnitine	CAR	34354	53598	94902	51123	17741	21084	14497	37945	29188	25813	34624	273950
0.71	204.124	85.1	LIPID-P-0002	Acetyl-carnitine	CAR	19258	22665	38999	10213	26710	14407	24185	65104	16352	16191	13607	141140
0.77	218.14	85.1	LIPID-P-0003	Propionyl-carnitine	CAR	7849.3	7562	11101	4655.2	7696	4875	7756	5154	5583.4	2984.2	7758.1	18243
0.865	246.171	85.1	LIPID-P-0005	Isovaleryl-carnitine	CAR	141700	152160	123860	144630	99953	94810	89629	112800	110880	155400	126680	144130
0.745	262.166	85.1	LIPID-P-0008	hydroxyisovaleroyl-carnitine	CAR	8616.1	16406	57643	7086.4	5231.7	5588.4	4729.9	4826.7	7804.6	5107	9402.8	8516.9
0.78	276.182	85.1	LIPID-P-0009	Hydroxyhexanoyl-carnitine	CAR	18105	22569	20660	25319	19840	14054	17503	18798	17274	23582	21038	18106
0.79	288.218	85.1	LIPID-P-0010	Octanoyl-carnitine	CAR	16607000	18928000	21706000	19236000	15665000	14946000	16137000	16969000	15458000	14786000	14476000	15822000
0.85	290.161	85.1	LIPID-P-0011	3-Methylglutaryl-carnitine	CAR	198450	206430	264420	214550	181510	174070	181090	220140	185760	177520	170970	186520
0.785	332.245	85.1	LIPID-P-0014	3-Hydroxy-decanoyl- carnitine	CAR	225960	258680	304910	254480	233280	238250	224340	250630	228210	223850	242650	266930
1.125	344.281	85.1	LIPID-P-0015	Lauroyl-carnitine	CAR	10747	8909.5	10453	6523.6	16099	13439	18847	15199	11579	7157.4	8874	9020.1
1.57	372.313	85.1	LIPID-P-0017	Myristoyl-carnitine	CAR	129030	70047	93341	75417	174240	108080	117180	185550	75662	79392	42528	45854
2.215	374.255	85.1	LIPID-P-0018	11-carboxyundecanoyl-carnitine	CAR	14659	17304	20737	14708	17048	16961	16248	17711	17490	27895	13440	15672
1.13	388.307	85.1	LIPID-P-0019	3-Hydroxy-tetradecanoyl- carnitine	CAR	22018	16281	15905	18998	10088	8284.4	6332	26944	10972	7928.6	7161	6333.8
2.445	400.344	85.1	LIPID-P-0020	Palmitoyl-carnitine	CAR	2961800	3019400	3664300	3658500	2940000	2164100	1965700	3680300	2186400	2143800	1139500	976850
1.585	416.339	85.1	LIPID-P-0021	3-Hydroxy-hexadecanoyl-carnitine	CAR	103440	165650	156680	144400	76411	53397	57863	152910	75260	58474	42022	28228
3.7	428.375	85.1	LIPID-P-0022	Stearoyl-carnitine	CAR	2578700	2223800	2684400	2295000	3061100	2214500	1738800	3451300	1996700	2469200	970030	849320
2.515	444.37	85.1	LIPID-P-0023	3-Hydroxy-octadecanoyl-carnitine	CAR	63764	88884	86542	79670	58485	48228	41714	121350	51341	48214	23478	20126
0.815	244.155	85.1	LIPID-P-0024	Tiglyl-carnitine	CAR	463740	545380	568440	538640	328880	366930	451490	412260	344230	385630	469120	428550
0.735	258.171	85.1	LIPID-P-0025	2-hexenoyl-carnitine	CAR	24588	28003	34158	36639	18696	31263	23322	23250	30642	33070	42992	43197
1.06	274.13	85.1	LIPID-P-0026	glutaconyl-carnitine	CAR	1913200	2529000	2095000	2066500	1903000	1570400	1600800	1926800	1893200	1836400	2089700	1971700
0.825	314.234	85.1	LIPID-P-0029	Decenoyl-carnitine	CAR	20565	34554	34608	27287	25599	25952	22847	27710	30406	19997	23393	22712
1.265	370.297	85.1	LIPID-P-0033	Tetradecenoyl-carnitine	CAR	37697	19880	33396	20636	75046	40326	74325	83295	30844	21637	14132	17777
1.75	398.328	85.1	LIPID-P-0035	Palmitoleoyl- carnitine	CAR	341850	326030	420810	334470	387800	290140	321890	318230	261190	153700	134230	93742
1.27	414.322	85.1	LIPID-P-0036	3-Hydroxy-palmitoleoyl- carnitine	CAR	38545	56602	45622	44345	34262	21796	30877	42516	34520	17992	20095	11646
2.66	426.36	85.1	LIPID-P-0037	Oleyl-carnitine	CAR	3682400	4076500	4137700	4576700	6268700	4102300	4047400	6073200	5888000	3506100	1786300	1206900
1.78	442.355	85.1	LIPID-P-0038	3-Hydroxy-octadecenoyl-carnitine	CAR	108820	232860	186340	162990	198760	126060	165710	267330	213220	119570	92965	52882
1.365	396.313	85.1	LIPID-P-0041	Palmitodileoyl- carnitine	CAR	18386	8461.9	10606	12139	29793	10757	25232	20779	11918	12617	5707.9	3516.6
1.96	424.344	85.1	LIPID-P-0042	Linoleyl-carnitine	CAR	1153700	909860	1331200	1089500	1699400	1011600	1051100	1494200	1157700	919250	459540	344430
1.385	440.339	85.1	LIPID-P-0043	3-Hydroxy-linoleyl- carnitine	CAR	44399	54691	62978	71633	40255	29063	35245	58352	48755	32387	20443	15761
13.28	614.597	369.35	LIPID-P-0044	CE(14:0)	CE	1452.3	372.68	1079.8	549.59	23390	21324	62121	28004	31656	21147	35255	18065
14.09	642.628	369.35	LIPID-P-0045	CE(16:0)	CE	109680	109530	103210	134910	818090	953590	3421900	2417200	1285400	2368500	2628700	3979500
15	670.66	369.35	LIPID-P-0046	CE(18:0)	CE	30277	27720	72051	35754	446240	463130	689240	973100	479530	521950	692670	720600
15.91	698.691	369.35	LIPID-P-0047	CE(20:0)	CE	2679.7	4887.9	1492.8	2068.7	57705	35662	73211	57238	53341	58014	56322	53033
17	726.722	369.35	LIPID-P-0048	CE(22:0)	CE	577.49	671.42	262.23	622.36	19935	9726	25274	13403	16112	16229	18537	21251
13.12	640.613	369.35	LIPID-P-0049	CE(16:1)	CE	120220	119200	97562	131000	3384300	2317200	3621700	2591200	2441000	1218300	2749300	2630800
13.93	668.644	369.35	LIPID-P-0050	CE(18:1)	CE	634600	467130	423880	553080	21427000	18546000	20819000	21934000	18155000	13952000	20748000	20088000
14.8	696.675	369.35	LIPID-P-0051	CE(20:1)	CE	16609	12988	9968.8	13163	805660	532520	530970	594560	602020	425390	741600	664960
15.68	724.707	369.35	LIPID-P-0052	CE(22:1)	CE	2532	1751.9	1914.1	2837.9	146820	78905	105240	120300	107180	85903	112390	125670
13.21	666.628	369.35	LIPID-P-0053	CE(18:2)	CE	607640	539100	361250	546290	19380000	14127000	17370000	17065000	15725000	13341000	13126000	13764000
14.01	694.657	369.35	LIPID-P-0054	CE(20:2)	CE	11565	16289	4807.7	7991	434310	465630	479460	482210	554080	309400	545020	564840
12.62	664.613	369.35	LIPID-P-0055	CE(18:3)	CE	29423	8332.7	13011	12100	1863800	1563800	1471500	1540300	1050900	930160	926990	1403800
13.28	692.644	369.35	LIPID-P-0056	CE(20:3)	CE	44821	39153	34225	41135	1819600	903620	1249700	1261600	1229900	851080	1070200	1138000
13.62	720.675	369.35	LIPID-P-0057	CE(22:3)	CE	842.36	395.67	385.66	434.22	143560	88795	67607	66537	51401	41665	67875	56069
12.72	690.628	369.35	LIPID-P-0058	CE(20:4)	CE	792000	1131800	609970	1474200	4695000	3470300	2907600	3391800	3237200	2239600	2176800	2739300
13.33	718.66	369.35	LIPID-P-0059	CE(22:4)	CE	7763.6	11617	7842.2	11178	494450	298830	316880	325740	330960	263770	352520	338680
12.23	688.613	369.35	LIPID-P-0060	CE(20:5)	CE	18798	15683	11755	27395	683990	360030	398520	319410	229830	393820	217570	333880
12.91	716.644	369.35	LIPID-P-0061	CE(22:5)	CE	16217	3319.2	4619.4	6554.5	805720	398960	507080	486850	372750	367030	402200	409110
12.4	714.628	369.35	LIPID-P-0062	CE(22:6)	CE	77622	86310	78957	89543	1490800	741970	702930	656330	593500	687660	476010	486990
7.08	540.536	266	LIPID-P-0063	Cer(d18:0/16:0)	Cer	46913	70040	74254	44154	18568	35581	36866	55631	50546	49198	48109	30545
8.32	568.567	266	LIPID-P-0064	Cer(d18:0/18:0)	Cer	26803	32719	57826	38734	29856	41967	34525	86284	50858	65764	27657	25543
10.21	624.629	266	LIPID-P-0066	Cer(d18:0/22:0)	Cer	54258	28176	60331	41121	24373	26711	20816	45709	55292	38067	23626	37735
10.56	652.661	266	LIPID-P-0067	Cer(d18:0/24:0)	Cer	53669	66167	165230	87948	40851	34708	64007	62301	27998	29005	43913	48823
6.73	538.52	264	LIPID-P-0068	Cer(d18:1/16:0)	Cer	1451800	1022400	1530800	2055200	1357000	3211100	2013400	1516400	1133100	1478300	1725200	1360000
7.825	566.551	264	LIPID-P-0069	Cer(d18:1/18:0)	Cer	343600	442660	629130	554400	737630	1524800	1084500	1243600	753380	862120	610920	525800
9.34	594.583	264	LIPID-P-0070	Cer(d18:1/20:0)	Cer	233160	239150	322100	318620	409290	330370	298400	651250	535930	475100	287350	303490
10.08	622.614	264	LIPID-P-0071	Cer(d18:1/22:0)	Cer	699360	801860	1081200	1097900	705160	1036400	799570	1546200	926720	1123300	790340	789760
10.44	650.645	264	LIPID-P-0072	Cer(d18:1/24:0)	Cer	8238900	9642200	9331500	9345400	9469100	8016500	7701500	13214000	7793400	7722400	6727400	5673500
5.97	536.504	264	LIPID-P-0073	Cer(d18:1/16:1)	Cer	60805	66972	93012	105490	74027	68823	66987	82890	75414	89180	44815	43257
7.795	592.567	264	LIPID-P-0075	Cer(d18:1/20:1)	Cer	53805	50074	53684	60630	64326	101490	69661	94020	65798	65701	52001	47844
8.8	620.598	264	LIPID-P-0076	Cer(d18:1/22:1)	Cer	202750	199150	253870	243530	185510	211420	192720	251060	223380	303070	157890	206710
10.025	648.629	264	LIPID-P-0077	Cer(d18:1/24:1)	Cer	1987300	1425700	2685400	2321700	2400700	3779600	2244900	3819900	3463500	3251400	3820100	2831400
10.62	676.661	264	LIPID-P-0078	Cer(d18:1/26:1)	Cer	227960	270570	215550	206290	278200	237860	260110	326870	201090	301730	198070	189320
10.845	784.667	264	LIPID-P-0081	HexCer(d18:1/22:0)	Cer-Hex	9406.6	30619	17368	18676	431180	782800	412030	352800	185870	113420	565590	253410
11.2	812.698	264	LIPID-P-0082	HexCer(d18:1/24:0)	Cer-Hex	1811.2	1911.2	5241.6	1755.5	85374	206370	66508	128130	59822	27874	141040	68567
11.58	840.729	264	LIPID-P-0083	HexCer(d18:1/26:0)	Cer-Hex	27949	22431	12629	33525	453940	770170	465280	488790	281610	119730	812500	322050
8.37	782.651	264	LIPID-P-0087	HexCer(d18:1/22:1)	Cer-Hex	17524	22313	23208	16493	20206	16366	11912	22745	17676	15503	11640	13251
12.385	578.588	248	LIPID-P-0089	Cer(m18:1/20:0)	Cerm	3069200	4362000	3696900	3762200	8549500	10294000	10284000	8276400	10131000	5685900	10996000	9458400
12.995	606.619	248	LIPID-P-0090	Cer(m18:1/22:0)	Cerm	164410	258450	245480	236890	1138400	1644700	1163800	1291300	1082900	860250	1410900	796150
13.67	634.65	248	LIPID-P-0091	Cer(m18:1/24:0)	Cerm	2207.1	1849.9	4722.5	3825.8	62207	46748	49046	51554	43844	19753	59315	34573
11.46	548.541	248	LIPID-P-0093	Cer(m18:1/18:1)	Cerm	7016.3	13642	25847	13657	22319	56437	61342	26623	42254	29687	60440	55094
12.36	604.603	248	LIPID-P-0094	Cer(m18:1/22:1)	Cerm	3108300	3538000	3507000	3168900	13354000	15137000	13572000	13411000	13553000	8085500	15764000	12173000
12.915	632.635	248	LIPID-P-0095	Cer(m18:1/24:1)	Cerm	67927	65426	62906	48958	817060	866570	676070	813030	747680	351360	868090	766860
8.55	562.424	264	LIPID-P-0096	CerP(d18:1/12:0)	CerP	228030	210720	372140	274710	227380	277590	199560	438790	255000	262400	128880	98109
9.825	590.455	264	LIPID-P-0097	CerP(d18:1/14:0)	CerP	482690	429190	762430	537160	548600	510800	399350	829620	604750	635020	371290	311260
10.27	618.486	264	LIPID-P-0098	CerP(d18:1/16:0)	CerP	27501000	26776000	34717000	29182000	35979000	33951000	29089000	52400000	29087000	32196000	21964000	20753000
10.595	646.518	264	LIPID-P-0099	CerP(d18:1/18:0)	CerP	21201000	26607000	24606000	19520000	29311000	23014000	34250000	33976000	21377000	30864000	14761000	13895000
10.975	674.549	264	LIPID-P-0100	CerP(d18:1/20:0)	CerP	44911	92226	63359	35380	84391	66017	104790	141980	92502	78027	48239	67910
9.765	616.471	264	LIPID-P-0104	CerP(d18:1/16:1)	CerP	526870	469960	1019300	617720	476390	518140	413540	748700	571550	544070	344400	313370
10.21	644.502	264	LIPID-P-0105	CerP(d18:1/18:1)	CerP	898980	790910	1313000	927870	1227700	1094800	787660	1582800	1007200	1029400	877180	772100
9.67	642.486	264	LIPID-P-0106	CerP(d18:1/18:2)	CerP	33924	27853	67489	55273	35818	27233	28228	39704	32411	28312	26346	28903
9.94	668.502	264	LIPID-P-0108	CerP(d18:1/20:3)	CerP	22075	27413	37939	32944	43792	25757	23299	45435	29707	38091	26025	19137
9.75	666.486	264	LIPID-P-0109	CerP(d18:1/20:4)	CerP	24608	21843	37570	21713	33293	19583	31078	37227	32717	26128	21979	14444
10.56	646.518	266	LIPID-P-0110	CerP(d18:0/18:1)	CerPdh	13197	10864	17291	13920	31297	23771	13833	18579	21918	16638	11455	14286
9.805	640.624	282	LIPID-P-0111	Cer(t18:0/22:0)	Cert	48091	47534	53903	47546	48537	33769	31785	54342	35684	46208	31309	23154
10.26	668.656	282	LIPID-P-0112	Cer(t18:0/24:0)	Cert	171510	212070	185740	224290	219930	137980	157030	250550	159940	203560	121270	100710
8.7	666.64	282	LIPID-P-0113	Cer(t18:0/24:1)	Cert	16203	19192	17869	17412	38899	32758	32111	26962	24889	26640	17252	20515
10.535	812.665	197	LIPID-P-0115	Coenzyme Q9	COQ	1946000	1191200	929110	1173800	1620600	1209300	1560800	2242600	1372800	2814600	1159000	782430
11.135	880.728	197	LIPID-P-0116	Coenzyme Q10	COQ	160930	140010	129830	139370	160530	75305	125210	127290	146930	258330	132630	66565
7.525	558.519	285.475	LIPID-P-0118	DG(14:0/16:0/0:0)	DG	48483	52849	59074	52608	68765	102790	83951	52068	62279	49839	71657	37394
8.86	586.55	257.507	LIPID-P-0119	DG(12:0/20:0/0:0)	DG	19862	22010	23793	20241	24389	30249	23072	22355	19826	29051	15230	11561
8.91	586.55	313.507	LIPID-P-0120	DG(16:0/16:0/0:0)	DG	1375800	1649200	1465800	1366800	1954700	2040600	1504300	1619500	1312900	1999900	1273900	1099000
9.94	614.582	257.538	LIPID-P-0123	DG(12:0/22:0/0:0)	DG	19643	25767	16863	33282	38908	48870	34648	28532	26941	26717	19465	32342
9.945	614.582	285.538	LIPID-P-0124	DG(14:0/20:0/0:0)	DG	14395	17806	11265	18092	28348	30149	32461	22526	13801	23898	17505	11490
9.945	614.582	313.538	LIPID-P-0125	DG(16:0/18:0/0:0)	DG	318840	385020	425990	470440	377460	318620	363460	374400	282260	418210	314820	280000
6.56	556.503	311.46	LIPID-P-0131	DG(14:0/16:1/0:0)	DG	27114	38063	51390	47445	24326	63108	102620	50893	59326	23619	42539	64594
7.575	584.535	285.491	LIPID-P-0134	DG(14:0/18:1/0:0)	DG	517210	480680	249270	347620	797220	1153900	1171900	709630	919490	443710	934680	496740
7.605	584.535	313.491	LIPID-P-0135	DG(16:0/16:1/0:0)	DG	1211000	1285600	936280	895810	684270	1276300	1374100	640250	765410	322500	1066700	566940
8.895	612.566	341.522	LIPID-P-0138	DG(16:1/18:0/0:0)	DG	67272	94216	93381	56113	51715	67383	51184	57861	34444	23219	37917	24168
8.995	612.566	313.522	LIPID-P-0142	DG(16:0/18:1/0:0)	DG	9819400	9999700	8284100	7710300	22412000	29407000	21710000	17797000	15911000	11968000	18196000	12327000
9.9	640.597	313.554	LIPID-P-0144	DG(16:0/20:1/0:0)	DG	39881	47381	39520	47419	183390	165610	150490	158210	106380	76971	105470	66658
9.96	640.597	341.554	LIPID-P-0146	DG(18:0/18:1/0:0)	DG	369360	453560	505050	508660	1509600	1433800	1259800	1202400	940550	764190	752100	582740
6.67	582.519	311.475	LIPID-P-0150	DG(16:1/16:1/0:0)	DG	193800	204040	255790	196620	71777	316120	377040	87196	314250	31626	282550	139300
6.76	582.519	337.475	LIPID-P-0151	DG(14:0/18:2/0:0)	DG	385080	227520	150800	201250	332920	818830	568670	314430	291010	214310	484280	336340
7.685	610.55	311.507	LIPID-P-0153	DG(16:1/18:1/0:0)	DG	3045800	3269800	2878700	2299900	2797300	5485100	6859700	3328200	4059100	1359600	6335300	2879400
7.85	610.55	337.507	LIPID-P-0156	DG(16:0/18:2/0:0)	DG	11286000	10963000	8124800	9109500	24289000	31854000	24033000	16237000	15257000	12807000	19463000	12732000
9.015	638.582	339.538	LIPID-P-0157	DG(18:1/18:1/0:0)	DG	17883000	22352000	18374000	14986000	82874000	94032000	83661000	68148000	68170000	35225000	68555000	40769000
9.07	638.582	337.538	LIPID-P-0159	DG(18:0/18:2/0:0)	DG	2405700	2174500	2793100	1885100	5774200	6662400	6170100	5211100	4895600	3557000	3668200	2724700
9.18	638.582	365.538	LIPID-P-0160	DG(16:0/20:2/0:0)	DG	129420	108680	105240	68981	401000	415910	287960	297710	318920	116540	211000	180770
9.94	666.613	339.569	LIPID-P-0161	DG(18:1/20:1/0:0)	DG	250650	201790	197150	186510	1990200	1426100	1623100	1724500	1366600	484160	1119400	685470
9.945	666.613	367.569	LIPID-P-0162	DG(18:1/20:0/0:0)	DG	252800	220400	159530	181410	1999300	1395900	1477600	1690700	1254900	564070	1286600	693640
10.1	666.613	337.569	LIPID-P-0163	DG(20:0/18:2/0:0)	DG	10403	10332	9233	9471.5	53982	32463	50458	34108	21823	27453	19419	17246
6.85	608.535	311.491	LIPID-P-0167	DG(16:1/18:2/0:0)	DG	1029500	793950	977100	653490	665600	2040400	2238500	802490	833060	463260	1257700	1255400
7.14	608.535	313.491	LIPID-P-0169	DG(16:0/18:3/0:0)	DG	169040	310340	277070	211810	484550	746680	612640	296620	304240	167470	392280	239610
7.87	636.566	391.522	LIPID-P-0170	DG(14:0/22:3/0:0)	DG	36208	34238	32384	23759	107360	117740	129450	80880	72651	49297	76903	54693
7.9	636.566	365.522	LIPID-P-0173	DG(16:1/20:2/0:0)	DG	76858	80069	65633	60328	162260	241880	288890	185560	159520	89685	154430	140040
7.905	636.566	283.522	LIPID-P-0174	DG(14:1/22:2/0:0)	DG	46936	67619	65694	30633	206190	262020	259020	184350	145030	119660	185430	120990
7.905	636.566	339.522	LIPID-P-0176	DG(18:1/18:2/0:0)	DG	13795000	14611000	12625000	10268000	35487000	56281000	49805000	35277000	37684000	21171000	36924000	23999000
8.145	636.566	363.522	LIPID-P-0178	DG(16:0/20:3/0:0)	DG	236560	213010	239500	176480	1543700	1103800	1169500	1163000	1093500	742890	774700	785740
8.62	664.597	365.554	LIPID-P-0181	DG(18:1/20:2/0:0)	DG	292750	219090	186840	131600	1677300	1590000	1610200	1661800	1363400	586720	1010000	869380
9.33	664.597	367.554	LIPID-P-0183	DG(18:2/20:1/0:0)	DG	595370	433400	324830	328440	2756900	2402700	2001800	1734900	1776900	983920	1365600	1204400
6.415	606.519	335.475	LIPID-P-0185	DG(16:1/18:3/0:0)	DG	75162	99715	108540	88688	71305	145110	85907	65820	76047	52572	77554	78483
6.505	606.519	361.475	LIPID-P-0187	DG(14:0/20:4/0:0)	DG	7909.2	14957	16991	18251	22733	19786	17330	9832.2	13297	20667	9930.5	5440.6
6.99	634.55	391.507	LIPID-P-0188	DG(14:1/22:3/0:0)	DG	22183	17839	15206	6689.5	23753	41473	41404	33565	37027	32171	26503	30472
7.015	634.55	337.507	LIPID-P-0189	DG(18:2/18:2/0:0)	DG	6437500	4521400	4316600	5085600	9950000	14799000	12181000	8999300	9838900	7083900	7031500	7464400
7.145	634.55	335.507	LIPID-P-0190	DG(18:1/18:3/0:0)	DG	479400	389130	501090	374770	1306200	1865200	1489800	1070200	931840	620900	948230	963130
7.56	634.55	313.507	LIPID-P-0192	DG(16:0/20:4/0:0)	DG	6910300	8194200	9594600	8347300	8882700	10522000	7121300	5844600	7892000	6034000	7416200	6242600
8.095	662.582	337.538	LIPID-P-0195	DG(18:2/20:2/0:0)	DG	319200	280160	174170	169000	1072100	1379100	1040100	931930	962190	518220	753280	613990
8.2	662.582	313.538	LIPID-P-0197	DG(16:0/22:4/0:0)	DG	222030	248920	234100	179380	786720	532480	393790	363230	278770	221260	205570	144080
8.22	662.582	363.538	LIPID-P-0199	DG(18:1/20:3/0:0)	DG	306980	371620	280400	218340	4255500	2870900	2289300	2883100	1919500	1537900	1269000	1274000
6.5	632.535	337.491	LIPID-P-0201	DG(18:2/18:3/0:0)	DG	834260	915480	1638600	812980	2060000	3507400	2663600	1605900	1410800	1053800	1121000	1383500
6.615	632.535	339.491	LIPID-P-0202	DG(18:4/18:1/0:0)	DG	44001	51359	86369	29675	124610	260290	266210	175000	68507	57389	59193	80626
6.625	632.535	311.491	LIPID-P-0203	DG(16:1/20:4/0:0)	DG	537160	505480	581190	375430	277440	471890	421870	262390	352560	146490	213830	261030
7.38	660.566	337.522	LIPID-P-0206	DG(18:2/20:3/0:0)	DG	505630	525460	469330	337050	830560	908620	825950	628230	516320	445910	408900	324530
7.595	660.566	339.522	LIPID-P-0207	DG(18:1/20:4/0:0)	DG	5345800	7531400	7206100	6112100	8257000	9612700	6970400	6550100	5508800	5210700	4804200	4657700
8.6	688.597	389.554	LIPID-P-0210	DG(18:1/22:4/0:0)	DG	507040	463520	347690	257110	1730200	1193600	958670	1068100	873960	506860	435340	441630
6.045	630.519	335.475	LIPID-P-0211	DG(18:3/18:3/0:0)	DG	21609	13172	21724	13696	29666	86136	51225	22782	30145	14617	25708	31744
6.79	658.55	337.507	LIPID-P-0212	DG(18:2/20:4/0:0)	DG	3075200	2504500	2851800	2662200	1560000	2476000	1477400	1369200	1648300	1550000	1135100	1023900
6.91	658.55	339.507	LIPID-P-0214	DG(18:1/20:5/0:0)	DG	88510	59440	68205	108460	229400	525530	465720	227310	166190	152800	180220	132490
7.25	658.55	313.507	LIPID-P-0215	DG(16:0/22:6/0:0)	DG	2152500	2224400	3260700	2051900	3672200	3284300	2250500	2334700	2463400	1774200	3285600	2662600
7.525	686.582	337.538	LIPID-P-0217	DG(18:2/22:4/0:0)	DG	1010700	577280	430070	516280	1304800	964130	705370	746270	742480	516240	416660	494970
7.7	686.582	339.538	LIPID-P-0219	DG(18:1/22:5/0:0)	DG	648770	321840	355990	346870	2927500	3556200	2178100	1857300	1100000	1011600	1429700	1262800
0.785	440.278	184.007	LIPID-P-0222	LPC(12:0/0:0)	LPC	11759	15387	18153	4421.9	6298.4	7154.9	11832	15982	8436.9	17669	8076.7	6594.7
1.48	468.309	184.008	LIPID-P-0223	LPC(14:0/0:0)	LPC	1391400	1440400	1973700	785130	1249100	1068600	1465400	1062200	1295900	1348300	1442400	996040
2.35	496.34	184.002	LIPID-P-0224	LPC(16:0/0:0)	LPC	2107900	2446100	2802800	1763100	2777800	2094300	2237200	1779100	2211600	1820000	2233600	1957800
3.66	524.372	184.005	LIPID-P-0225	LPC(18:0/0:0)	LPC	2146200	3069300	2862800	2159900	2746300	2402100	2067200	1851800	1972600	2023400	1737100	1603400
4.55	552.403	184.003	LIPID-P-0226	LPC(20:0/0:0)	LPC	1460000	1491300	1515600	1255000	1979600	1279000	1610200	1208200	1261900	988140	1563800	1317300
5.125	580.434	184.008	LIPID-P-0227	LPC(22:0/0:0)	LPC	475800	458280	604790	393620	410750	253000	325190	350140	311550	245910	287940	199760
5.62	608.466	184.001	LIPID-P-0228	LPC(24:0/0:0)	LPC	445100	376900	578590	499070	539980	307400	310210	365870	350030	281860	250780	221980
1.265	466.293	184.009	LIPID-P-0229	LPC(14:1/0:0)	LPC	25848	35335	33297	14108	16689	16390	27839	19556	13789	23672	18479	14480
1.575	494.325	184.003	LIPID-P-0230	LPC(16:1/0:0)	LPC	5470500	5646100	6098600	3083100	3576600	3386200	4917400	2710000	3902100	2608700	4868900	3948600
2.475	522.356	184.006	LIPID-P-0231	LPC(18:1/0:0)	LPC	66334000	95246000	85464000	45953000	51731000	36089000	50208000	30686000	42226000	23447000	51322000	40063000
3.775	550.387	184.004	LIPID-P-0232	LPC(20:1/0:0)	LPC	5140200	6912000	5536200	3441800	6074100	3990100	4852700	2804600	4124000	3248700	5601700	5197200
4.56	578.419	184.008	LIPID-P-0233	LPC(22:1/0:0)	LPC	118770	113740	112240	72834	190780	104540	117790	99939	104130	90017	97445	74836
2.735	548.372	184.006	LIPID-P-0235	LPC(20:2/0:0)	LPC	4062100	3959900	3509800	2086800	1964500	1925000	2676100	1501400	2589800	1455100	3598200	3484900
3.99	576.403	184.009	LIPID-P-0236	LPC(22:2/0:0)	LPC	21441	22235	15771	11874	19696	19358	13189	8255.4	11661	5407.9	15754	12973
1.445	518.325	184.008	LIPID-P-0237	LPC(18:3/0:0)	LPC	1330500	3142100	4491700	3007700	2244500	1966200	3171800	1928400	1961900	1292800	1903300	1519300
2.1	546.356	184.007	LIPID-P-0238	LPC(20:3/0:0)	LPC	16828000	25009000	36514000	19506000	45542000	30559000	49504000	40577000	41832000	27526000	33249000	29536000
1.745	544.34	184.005	LIPID-P-0240	LPC(20:4/0:0)	LPC	286760000	383460000	398900000	382510000	317590000	288690000	263780000	218420000	271160000	215880000	215960000	168710000
2.485	572.372	184.002	LIPID-P-0241	LPC(22:4/0:0)	LPC	1754700	2854700	4002000	3433700	1520300	955850	1131100	1019000	1260400	959220	1013200	846190
1.38	542.325	184.006	LIPID-P-0242	LPC(20:5/0:0)	LPC	1884100	2269200	3487400	2694800	4515300	3471700	5050200	2735900	3044100	2577000	2641000	1809300
1.665	568.34	184.009	LIPID-P-0243	LPC(22:6/0:0)	LPC	79681000	125300000	172970000	130040000	67929000	60158000	44725000	49336000	57714000	43290000	45471000	36758000
1.84	482.361	184	LIPID-P-0245	LPC(O-16:0/0:0)	LPC-O	3072500	3440100	4120300	2026100	1898000	1447300	1753400	1207200	1690300	1214200	1926800	1238500
2.98	510.392	184	LIPID-P-0246	LPC(O-18:0/0:0)	LPC-O	13617000	19359000	20127000	15290000	7994700	6305800	6116700	4884300	5243300	4417500	5672300	4464900
4.16	538.424	184	LIPID-P-0247	LPC(O-20:0/0:0)	LPC-O	13937000	14008000	14855000	13329000	13039000	11881000	10731000	11003000	10581000	11888000	10510000	10547000
5.36	566.455	184	LIPID-P-0248	LPC(O-22:0/0:0)	LPC-O	45398	53341	57525	40494	49106	31657	31470	36638	28286	35853	33118	31250
2.05	508.377	184	LIPID-P-0251	LPC(O-18:1/0:0)	LPC-O	397100	376630	370530	174800	224580	170390	297400	161260	190310	150760	207690	202210
3.165	536.408	184	LIPID-P-0252	LPC(O-20:1/0:0)	LPC-O	1154100	1592500	1439200	709650	590350	488760	696070	382800	668530	324370	730310	580430
1.47	506.361	184	LIPID-P-0254	LPC(O-18:2/0:0)	LPC-O	20060	22879	32902	21869	14793	19355	32856	24765	29323	12871	17334	9853.2
2.21	534.392	184	LIPID-P-0255	LPC(O-20:2/0:0)	LPC-O	102160	138860	113820	70131	22644	33415	31657	18143	38202	19370	47387	49688
1.875	532.377	184	LIPID-P-0258	LPC(O-20:3/0:0)	LPC-O	18459	21036	79086	33628	5593.7	6082.8	11730	5755.1	8152.2	4406.1	6832.8	2109.8
1.52	530.361	184	LIPID-P-0259	LPC(O-20:4/0:0)	LPC-O	122120	164040	231470	175800	73841	75489	97151	67109	64952	50272	43402	28253
2.125	558.392	184	LIPID-P-0260	LPC(O-22:4/0:0)	LPC-O	91853	100850	162870	108360	21086	14740	22153	14132	20306	10833	15883	15073
1.585	556.377	184	LIPID-P-0261	LPC(O-22:5/0:0)	LPC-O	41445	67819	105820	60167	13140	15374	21290	17430	23398	13020	11157	6821
1.52	426.262	285.254	LIPID-P-0262	LPE(0:0/14:0)	LPE	15701	10426	18052	5911.8	10497	13240	18106	9643.9	14797	7311.4	16247	9278.5
2.445	454.293	313.286	LIPID-P-0263	LPE(0:0/16:0)	LPE	17940000	21580000	19381000	13489000	20897000	22279000	21316000	16652000	22012000	13459000	18015000	16606000
3.775	482.325	341.317	LIPID-P-0264	LPE(0:0/18:0)	LPE	24060000	32127000	27186000	23751000	46080000	49279000	39929000	33662000	43284000	36062000	33304000	28932000
5.185	538.387	397.379	LIPID-P-0266	LPE(0:0/22:0)	LPE	18060	33059	23310	15148	29201	27849	26449	20178	19095	17212	17575	13970
5.71	566.419	425.411	LIPID-P-0267	LPE(0:0/24:0)	LPE	25765	34991	51557	29863	32245	42658	28208	31579	38599	26764	19550	34291
2.68	480.309	339.301	LIPID-P-0270	LPE(0:0/18:1)	LPE	3750900	4710500	4246500	2782400	4792000	4323400	5842400	4034700	4868300	2392100	5470600	3894100
3.88	508.34	367.332	LIPID-P-0271	LPE(0:0/20:1)	LPE	316920	357730	276020	213320	513450	504820	525920	347240	503580	295150	595550	529350
4.645	536.372	395.364	LIPID-P-0272	LPE(0:0/22:1)	LPE	13070	13900	15790	11640	27387	32716	20314	22480	22326	18180	16891	14874
5.145	564.403	423.395	LIPID-P-0273	LPE(0:0/24:1)	LPE	9464	15199	13428	7865.9	21091	21190	9576.4	11519	13755	11249	12217	9759.6
1.86	478.293	337.286	LIPID-P-0274	LPE(0:0/18:2)	LPE	6753900	7996900	7698100	8743400	10339000	7017700	10755000	8375000	7220700	4593200	5553600	3846500
2.855	506.325	365.317	LIPID-P-0275	LPE(0:0/20:2)	LPE	140560	126710	95403	74954	107530	146940	168070	110520	173000	93144	202670	191690
1.48	476.278	335.27	LIPID-P-0276	LPE(0:0/18:3)	LPE	56655	112230	141330	108290	54931	60008	92214	60943	62935	32880	44051	39155
2.18	504.309	363.301	LIPID-P-0277	LPE(0:0/20:3)	LPE	807250	1070000	1141100	771330	2358400	1429400	2423200	2052300	1810800	1246800	1401400	1228500
1.825	502.293	361.286	LIPID-P-0279	LPE(0:0/20:4)	LPE	13399000	18854000	19402000	17620000	15686000	13887000	14464000	10626000	13739000	10066000	10432000	7568300
2.5	530.325	389.317	LIPID-P-0280	LPE(0:0/22:4)	LPE	378450	611820	628600	536460	368210	268900	292600	270620	354680	239620	253890	190310
1.975	528.309	387.301	LIPID-P-0282	LPE(0:0/22:5)	LPE	1770900	1748300	1956400	1910200	1644500	1449200	1049500	1024100	1803100	1088300	1475100	1166900
1.735	526.293	385.286	LIPID-P-0283	LPE(0:0/22:6)	LPE	17211000	27725000	36138000	26728000	15261000	14018000	9961100	12557000	15214000	11110000	10899000	8889400
1.89	554.325	413.317	LIPID-P-0284	LPE(0:0/24:6)	LPE	51644	38809	55148	45346	28699	23402	39992	45349	36736	30334	34908	32473
2.115	466.33	325.322	LIPID-P-0285	LPE(P-18:0/0:0)	LPE-P	14450	22360	21373	13040	10678	10271	17582	8781.5	12277	4712.4	8870.3	7425.8
3.315	494.361	353.353	LIPID-P-0286	LPE(P-20:0/0:0)	LPE-P	52081	63849	62692	32521	45214	47347	61184	39082	54763	26295	66659	44907
2.015	485.288	313.28	LIPID-P-0287	LPG(16:0/0:0)	LPG	3234.4	7804.5	8352.8	4048.7	5581.3	4928.7	8683.8	9873.7	9585.1	3948.4	6350	4447.6
1.835	498.283	313.275	LIPID-P-0288	LPS(16:0/0:0)	LPS	68737	85946	91167	63898	83838	71509	72246	58029	69429	54804	62626	59458
2.99	526.314	341.307	LIPID-P-0289	LPS(18:0/0:0)	LPS	52702	103730	102380	55116	288020	286030	159740	415690	277560	204320	349140	272620
1.955	524.299	339.307	LIPID-P-0290	LPS(18:1/0:0)	LPS	14758	26202	23287	8029.6	37126	22210	22268	37197	24331	14157	21546	16346
3.905	348.321	257.277	LIPID-P-0292	MG(16:0/0:0/0:0)	MG	365320	419820	404120	399700	302210	264100	321410	303500	294760	320960	271130	281320
4.67	376.352	285.308	LIPID-P-0293	MG(18:0/0:0/0:0)	MG	419230	414610	466420	406340	303730	324440	353810	353620	322250	328040	284050	307690
6.625	703.528	605.52	LIPID-P-0300	PA(18:0/18:1)	PA	10855	3983.2	18772	9905.9	17001	7375.2	26636	22617	13434	12344	17153	10345
7.77	762.601	524.593	LIPID-P-0307	PC(16:0/18:0)	PC	64484	119150	106560	142020	69173	72956	72616	97960	85751	69151	34044	49026
9.355	790.633	184	LIPID-P-0311	PC(18:0/18:0)	PC	10925000	14876000	16939000	18781000	9978200	10758000	9581800	10392000	12020000	10847000	8632800	5986200
10.085	818.664	184	LIPID-P-0312	PC(16:0/22:0)	PC	6575900	4404300	7126000	6796600	6524500	5979500	4474700	6783700	5001000	5377900	4930600	4611100
10.49	846.695	184	LIPID-P-0314	PC(18:0/22:0)	PC	251640	367220	464990	525270	293650	278280	190790	381990	417460	321900	152460	213550
6.005	732.554	468.547	LIPID-P-0316	PC(14:0/18:1)	PC	9151.4	11150	21314	15313	33450	30411	52265	46983	31552	40042	42969	15628
6.77	760.586	522.578	LIPID-P-0322	PC(16:0/18:1)	PC	205290	188370	270960	173010	456400	328800	342240	354280	301140	318900	290270	303220
7.875	788.617	524.609	LIPID-P-0330	PC(18:0/18:1)	PC	388350	447470	634420	400520	813280	629490	612380	718840	532880	585140	406610	386800
9.14	816.648	184	LIPID-P-0331	PC(18:0/20:1)	PC	1890700	3219500	7487400	2998600	2744800	2985300	3037000	3302900	2837200	3239800	2290700	1779000
10.035	844.68	184	LIPID-P-0334	PC(20:1/20:0)	PC	288040	375230	534980	539090	432380	432180	433420	538150	490290	505950	276480	310040
10.48	872.711	184	LIPID-P-0335	PC(20:0/22:1)	PC	140680	141040	285360	226730	172080	159590	149810	178970	158470	155600	49241	105430
5.635	730.539	468.531	LIPID-P-0342	PC(14:0/18:2)	PC	133420	84805	102180	89423	165950	129310	150020	143720	102750	185830	152430	95248
6.19	758.57	184	LIPID-P-0346	PC(12:0/22:2)	PC	12539000	8780500	10497000	10415000	16504000	15426000	17281000	16924000	14231000	15964000	13805000	14885000
6.21	758.57	520.562	LIPID-P-0347	PC(16:0/18:2)	PC	385730	365770	327400	360590	658040	502570	490510	583780	517920	506270	419360	499650
7.02	786.601	184	LIPID-P-0352	PC(18:0/18:2)	PC	9274700	7515700	10877000	7840400	11758000	11720000	12312000	14003000	10578000	11739000	10636000	8577200
8.035	814.633	184	LIPID-P-0357	PC(18:2/20:0)	PC	30242000	28050000	44026000	21242000	17099000	15956000	24921000	24213000	23195000	18155000	26356000	19856000
9.71	842.664	184	LIPID-P-0362	PC(18:2/22:0)	PC	482840	367580	678030	422320	387780	382510	367230	535810	517890	377990	305050	269370
10.22	870.695	184	LIPID-P-0363	PC(20:1/22:1)	PC	430940	352840	502390	462410	347370	226060	356000	240440	349960	274290	232620	229880
5.385	728.523	184	LIPID-P-0366	PC(14:0/18:3)	PC	4758900	3481200	5799000	2200800	2109900	2782500	4181500	5436500	2882800	4955100	2788500	3160600
5.77	756.554	184	LIPID-P-0371	PC(14:0/20:3)	PC	29741000	73669000	83168000	55761000	43702000	42206000	55197000	57745000	41848000	34543000	35435000	50889000
6.335	784.586	184	LIPID-P-0377	PC(16:0/20:3)	PC	2755400	2167900	2991500	2976700	3196100	3122400	2548000	2521200	2949500	2973700	2390500	2150400
6.99	812.617	550.609	LIPID-P-0384	PC(20:1/18:2)	PC	14827	10791	10455	19059	11218	18166	21476	14941	24339	5016.1	24400	26147
7.285	812.617	184	LIPID-P-0387	PC(16:1/22:2)	PC	301980000	378080000	445250000	296770000	504590000	413870000	468340000	547270000	450410000	485150000	390390000	394350000
8.11	840.648	184	LIPID-P-0390	PC(22:2/18:1)	PC	2301600	2332900	2685000	2036100	1574300	1893400	2057200	2129400	2637900	2223200	2188400	1878100
9.58	868.68	184	LIPID-P-0392	PC(20:1/22:2)	PC	661610	697130	794620	671410	842380	512120	623980	636660	688640	613280	531890	490600
10.17	896.711	184	LIPID-P-0393	PC(22:1/22:2)	PC	103630	100660	117170	129200	58545	64694	53884	51115	57365	70014	36537	29511
5.35	726.507	184	LIPID-P-0394	PC(18:3/14:1)	PC	1738700	2529800	1864800	747720	681410	798120	967900	1770400	845810	2348300	494680	550580
5.55	754.539	184	LIPID-P-0398	PC(14:0/20:4)	PC	46633000	36264000	57875000	33670000	33065000	35892000	33318000	46614000	38683000	65700000	32046000	23020000
5.795	782.57	520.562	LIPID-P-0402	PC(18:2/18:2)	PC	165830	98824	124990	107490	397880	296100	414890	324240	288220	304070	296630	272510
6.075	782.57	184	LIPID-P-0407	PC(18:3/18:1)	PC	12120000	14262000	16988000	13726000	14281000	14626000	9765400	11712000	12272000	14342000	11659000	11090000
6.095	782.57	496.562	LIPID-P-0408	PC(16:0/20:4)	PC	2750600	2540400	2645300	2612800	2965300	2983400	2424300	2381200	2675200	2915700	2492300	2263900
6.33	810.601	520.593	LIPID-P-0410	PC(18:2/20:2)	PC	8561.1	4755.8	8646.4	6169.9	26141	5198.1	6720.8	5273.6	9141.1	478.69	3835.2	6158.2
6.88	810.601	524.593	LIPID-P-0418	PC(18:0/20:4)	PC	2572900	2634500	2712000	2709100	1846500	2145500	1990400	1928000	1917100	2393100	1552000	1638200
7.595	838.633	184	LIPID-P-0422	PC(18:0/22:4)	PC	13939000	28457000	35749000	30902000	23451000	13179000	10620000	17698000	13210000	17402000	10482000	11771000
8.68	866.664	184	LIPID-P-0427	PC(20:3/22:1)	PC	468800	721620	733360	602040	415080	329740	300110	391730	291100	367010	228860	245760
5.14	724.492	184	LIPID-P-0429	PC(20:5/12:0)	PC	109070	161090	190310	110350	66637	83666	92830	129260	65425	134710	56826	33659
5.3	752.523	184	LIPID-P-0430	PC(14:0/20:5)	PC	1869200	1946100	2241600	1090700	1990000	1257900	2098900	2449800	1677400	3240900	1597500	1087100
5.66	780.554	184	LIPID-P-0436	PC(22:4/14:1)	PC	36956000	24245000	49179000	32739000	92508000	74693000	82061000	71891000	57815000	65360000	45600000	47977000
5.875	808.586	550.578	LIPID-P-0441	PC(20:1/18:4)	PC	18822	13786	13619	6314.9	9137.6	9374.4	7008.7	14174	18556	20494	15155	6365
6.015	808.586	184	LIPID-P-0445	PC(16:0/22:5)	PC	265780000	265780000	277870000	246270000	192350000	179800000	183340000	163190000	182250000	158120000	200610000	181120000
6.385	808.586	524.578	LIPID-P-0449	PC(20:5/18:0)	PC	38442	75636	111610	70744	116050	93877	115800	83678	70306	118280	39340	27681
6.645	836.617	184	LIPID-P-0454	PC(18:0/22:5)	PC	51982000	27477000	39363000	26489000	35279000	32777000	31470000	34852000	39050000	32248000	37857000	44068000
7.745	864.648	184	LIPID-P-0461	PC(22:0/20:5)	PC	779730	517230	865270	702720	384620	424370	385360	318510	361000	287390	255000	206210
8.975	892.68	184	LIPID-P-0462	PC(22:0/22:5)	PC	549910	690150	727810	660600	468680	331450	340640	300840	343470	399450	251510	296180
4.49	750.507	184	LIPID-P-0463	PC(12:0/22:6)	PC	377300	286230	455000	305800	323310	358000	440360	725780	446230	896450	325950	295380
5.44	778.539	184	LIPID-P-0465	PC(14:0/22:6)	PC	10172000	8038600	16599000	6766100	5452400	5158300	4509100	8398600	6200600	10224000	5996700	5240400
5.705	806.57	520.562	LIPID-P-0469	PC(18:2/20:4)	PC	266610	252240	273320	319140	266330	219570	243690	270740	227750	289900	162460	178310
6.65	834.601	550.593	LIPID-P-0480	PC(20:1/20:5)	PC	342160	405500	508630	442070	236020	249530	166740	256510	228180	192850	193990	240210
7.24	862.633	184	LIPID-P-0483	PC(20:0/22:6)	PC	840190	1566700	2231600	1687200	580750	268500	359940	634670	671280	493440	556620	448910
8.145	890.664	184	LIPID-P-0484	PC(22:0/22:6)	PC	150760	130120	115280	171010	54031	68888	88342	84891	100200	101870	51436	66223
5.465	804.554	184	LIPID-P-0489	PC(16:1/22:6)	PC	39329000	39312000	54946000	36132000	27889000	23465000	32367000	27088000	24878000	28892000	27548000	21272000
6.635	860.617	184	LIPID-P-0500	PC(20:1/22:6)	PC	6500200	5934200	7329600	6350300	4350800	3952000	4153100	4078800	4125100	3823600	5517700	6298400
7.62	888.648	184	LIPID-P-0502	PC(22:1/22:6)	PC	81214	133900	162100	132200	64533	64239	35627	75854	21896	56916	36169	61198
5.585	830.57	184	LIPID-P-0504	PC(18:2/22:6)	PC	74106000	121040000	102890000	129550000	70989000	64369000	73317000	67036000	75540000	69657000	49204000	41027000
5.61	830.57	544.562	LIPID-P-0506	PC(20:4/20:4)	PC	33192	87330	70579	100150	48349	44920	67030	33699	37252	34222	27445	16718
6.04	858.601	184	LIPID-P-0507	PC(20:2/22:6)	PC	3598700	3474900	3013000	2693300	1403300	1426800	1723800	1824000	2215800	1936800	2628400	2205700
5.95	886.633	184	LIPID-P-0509	PC(22:2/22:6)	PC	88522	113160	108670	105340	111360	72246	67746	70071	63793	71932	43579	59744
6.465	692.559	184	LIPID-P-0513	PC(O-16:0/14:0)	PC-O	789480	872830	602960	902890	727600	850260	828840	601780	433750	675750	468040	519140
7.4	720.591	184	LIPID-P-0514	PC(O-16:0/16:0)	PC-O	29929000	56414000	31363000	33411000	37034000	33388000	41993000	47642000	31802000	37496000	25632000	28203000
8.82	748.622	184	LIPID-P-0515	PC(O-16:0/18:0)	PC-O	7693000	11709000	15245000	12491000	13605000	10852000	11979000	17575000	10468000	8630000	7903100	5499100
9.93	776.653	184	LIPID-P-0516	PC(O-18:0/18:0)	PC-O	519800	600870	1178300	744720	787140	709500	768370	1185600	881330	735020	577130	493510
10.39	804.685	184	LIPID-P-0517	PC(O-18:0/20:0)	PC-O	581300	770080	983980	759380	362230	390570	537860	518460	354130	310580	334960	302230
5.675	690.544	184	LIPID-P-0520	PC(O-16:0/14:1)	PC-O	2535700	2683200	3506600	3957200	2149600	2828700	2188000	2024600	1921000	1991200	1816700	1523800
6.315	718.575	184	LIPID-P-0521	PC(O-16:0/16:1)	PC-O	51036	21964	50527	65098	15075	31011	21572	33040	29643	23956	13810	16738
7.445	746.606	184	LIPID-P-0522	PC(O-16:0/18:1)	PC-O	20818000	42374000	20393000	26203000	41150000	36286000	35408000	48719000	27156000	29970000	24180000	21505000
8.12	774.638	184	LIPID-P-0523	PC(O-18:0/18:1)	PC-O	4524600	4307100	4087800	4224700	4667500	2923200	3062400	4348000	3636300	3339300	2351400	2039500
9.83	802.669	184	LIPID-P-0524	PC(O-18:1/20:0)	PC-O	93247000	75236000	95199000	88823000	116230000	85907000	83625000	103210000	85777000	95115000	58644000	49218000
10.265	830.7	184	LIPID-P-0525	PC(O-20:1/20:0)	PC-O	22847000	35734000	26845000	20759000	26700000	17904000	36136000	29524000	20867000	28354000	13735000	14051000
4.5	660.497	184	LIPID-P-0527	PC(O-16:0/12:2)	PC-O	28527	43326	57529	11108	20666	14399	11420	10342	12557	9957.2	21057	12019
5.78	716.559	184	LIPID-P-0529	PC(O-16:0/16:2)	PC-O	986470	711080	1104700	728430	587820	549690	558450	435880	395670	598070	427460	505210
6.685	744.591	184	LIPID-P-0530	PC(O-16:0/18:2)	PC-O	2652200	2742200	3165600	2572600	2749600	2416600	3023100	2765100	2284100	2651700	1631500	1799900
7.505	772.622	184	LIPID-P-0531	PC(O-18:0/18:2)	PC-O	1838000	2691500	2792100	1590200	3951300	3299000	3135300	3475500	2840500	2681100	1979500	2620600
8.435	800.653	184	LIPID-P-0532	PC(O-18:1/20:1)	PC-O	4883600	4219000	5177500	4659500	6807600	3934300	3257500	4559000	3283400	3943700	1993000	2358300
9.73	828.685	184	LIPID-P-0533	PC(O-20:1/20:1)	PC-O	2272500	1898900	2274000	2245800	2473400	2092200	2061200	2465800	1835300	1948000	833600	1441500
10.32	856.716	184	LIPID-P-0534	PC(O-20:1/22:1)	PC-O	100700	61388	117560	82534	90246	64080	82012	59895	69779	36827	71933	42337
6.565	742.575	184	LIPID-P-0535	PC(O-16:2/18:1)	PC-O	2429400	1881300	2595800	1961700	3802200	4041200	5049000	5301000	3116100	5771700	2629300	3273100
6.94	770.606	184	LIPID-P-0536	PC(O-18:2/18:1)	PC-O	250180	376160	888620	625790	620750	440440	771850	1273200	402070	693090	525760	506930
7.625	798.638	184	LIPID-P-0537	PC(O-18:2/20:1)	PC-O	981820	1995900	1796300	1503700	1228400	1300300	1437200	1899100	1117100	1245500	914150	875430
10.01	854.7	184	LIPID-P-0539	PC(O-20:2/22:1)	PC-O	27241	71298	64135	48929	68269	46480	76056	31774	30900	28121	22571	25016
5.875	740.559	184	LIPID-P-0540	PC(O-16:2/18:2)	PC-O	230490	297240	231710	340480	133170	145800	125660	140410	103170	107730	93531	105690
6.565	768.591	184	LIPID-P-0541	PC(O-18:2/18:2)	PC-O	27473000	37317000	23419000	31833000	37152000	31184000	35255000	38616000	24830000	28033000	17201000	21741000
7.2	796.622	184	LIPID-P-0542	PC(O-18:2/20:2)	PC-O	7744600	15950000	12378000	11247000	11266000	7396000	8371700	15092000	7994200	7027400	5262900	6266200
8	824.653	184	LIPID-P-0543	PC(O-20:2/20:2)	PC-O	225290	444090	507980	301200	362370	161850	204080	308530	238960	153300	130340	126430
8.895	852.685	184	LIPID-P-0544	PC(O-20:2/22:2)	PC-O	87853	117870	151280	177680	151530	117550	87945	113480	66827	76719	78854	66950
5.465	738.544	184	LIPID-P-0546	PC(O-16:2/18:3)	PC-O	78629	44486	59824	96637	46266	51337	38848	60573	42992	57739	52402	53332
6.42	766.575	184	LIPID-P-0547	PC(O-18:3/18:2)	PC-O	24926000	28914000	30677000	28767000	20693000	22709000	18295000	19795000	15654000	18326000	13040000	11888000
6.59	794.606	184	LIPID-P-0548	PC(O-18:3/20:2)	PC-O	23398000	35426000	23741000	26539000	37512000	32437000	29927000	41499000	28340000	26865000	21878000	24647000
7.24	822.638	184	LIPID-P-0549	PC(O-20:3/20:2)	PC-O	807820	1240100	951190	927090	707460	476010	514840	523910	484980	439890	472700	331650
8.16	850.669	184	LIPID-P-0550	PC(O-20:3/22:2)	PC-O	334360	628640	379050	414030	409250	419410	529150	250000	303680	352710	229210	252470
9.325	878.7	184	LIPID-P-0551	PC(O-20:2/24:3)	PC-O	103590	179820	159580	233310	126710	76647	138110	112120	94823	119680	49574	63488
6.005	764.559	184	LIPID-P-0552	PC(O-18:3/18:3)	PC-O	345440	259810	401230	334700	402680	592530	660290	486860	479310	517270	335950	394750
6.42	792.591	184	LIPID-P-0553	PC(O-18:3/20:3)	PC-O	7835300	10753000	11665000	10648000	5357900	5538300	5611300	6452200	4506800	5185700	3444800	4381100
6.63	820.622	184	LIPID-P-0554	PC(O-20:3/20:3)	PC-O	589620	1200600	1270100	984510	531640	477340	528340	753020	618700	481280	342700	431150
7.71	848.653	184	LIPID-P-0555	PC(O-20:3/22:3)	PC-O	107300	206760	257620	218760	136900	107430	102140	188440	68076	124200	77125	72032
6.245	790.575	184	LIPID-P-0558	PC(O-18:3/20:4)	PC-O	1068500	1529900	1707200	1473700	788480	819150	543780	721710	611570	609590	517010	480100
6.39	818.606	184	LIPID-P-0559	PC(O-20:3/20:4)	PC-O	1424700	3061000	2023800	1688700	1168200	1446200	769730	1770500	1109500	1070200	890440	756290
7.24	846.638	184	LIPID-P-0560	PC(O-20:4/22:3)	PC-O	75660	73086	103550	82230	59781	29391	44004	61929	35059	45942	49234	33615
5.875	816.591	184	LIPID-P-0562	PC(O-20:4/20:4)	PC-O	382440	461970	666930	546510	220340	242240	167450	271100	183770	253590	175040	183840
9.555	748.586	607.578	LIPID-P-0570	PE(18:0/18:0)	PE	553700	708530	669680	1215600	830470	769880	779740	668040	850370	832350	547620	551880
5.625	662.476	521.468	LIPID-P-0573	PE(16:1/14:0)	PE	61425	34696	53523	24115	23331	43979	81345	28350	44921	36000	43694	33286
7.005	718.539	265	LIPID-P-0575	PE(16:1/18:0)	PE	196700	158410	148400	163300	290490	149430	240530	230930	117820	138860	123780	113980
9.535	774.601	633.593	LIPID-P-0581	PE(20:1/18:0)	PE	736550	683220	776600	689380	1938500	815700	1105100	1540100	1468400	1166000	895080	848910
5.56	660.46	519.453	LIPID-P-0584	PE(18:2/12:0)	PE	20047	10867	17046	4941.8	17978	22886	29544	23792	20939	22100	10059	15179
5.735	688.492	547.484	LIPID-P-0585	PE(18:2/14:0)	PE	1134400	561720	1029400	547950	638040	798270	908790	621570	669050	649520	670490	673880
6.37	716.523	319	LIPID-P-0588	PE(22:2/12:0)	PE	514380	355910	436110	424380	520260	467010	629780	506400	517310	360270	359940	368930
6.385	716.523	575.515	LIPID-P-0589	PE(16:0/18:2)	PE	97294000	74479000	73194000	85818000	88965000	84931000	102980000	87391000	81654000	82054000	74590000	76887000
7.28	744.554	319	LIPID-P-0591	PE(22:2/14:0)	PE	365640	263570	284560	278420	607060	511310	640560	691630	445870	444760	429570	415990
10.185	828.648	687.64	LIPID-P-0597	PE(22:1/20:1)	PE	10548	10120	21612	8149.6	19897	11450	20337	12991	20442	8165.9	9775	5415.8
5.45	686.476	545.468	LIPID-P-0599	PE(18:2/14:1)	PE	127980	185960	196180	113320	37043	56622	49189	126790	61754	145280	32397	31938
6.42	742.539	319	LIPID-P-0601	PE(22:2/14:1)	PE	137600	55495	86397	89570	179350	116400	212140	180250	123290	120910	131020	126960
8.375	798.601	657.593	LIPID-P-0606	PE(18:1/22:2)	PE	211400	189180	273400	181060	252880	134740	177230	239930	219020	264480	155650	172360
5.655	712.492	571.484	LIPID-P-0609	PE(18:3/16:1)	PE	582400	376670	750190	382960	376730	458160	513830	367380	626800	457770	437340	417980
6.27	740.523	239	LIPID-P-0611	PE(16:0/20:4)	PE	1701200	1635000	1508000	1384900	1213400	1310200	1247800	1315200	1479700	1293300	1227300	962240
7.155	768.554	287	LIPID-P-0614	PE(18:0/20:4)	PE	1568000	1303700	1601300	1514000	1898000	1937100	1486200	1676300	1527100	1819800	1301200	1225000
7.155	768.554	259	LIPID-P-0615	PE(18:4/20:0)	PE	460700	444710	482620	511160	535040	655240	478820	538350	527450	543780	408550	359300
7.895	796.586	655.578	LIPID-P-0617	PE(18:0/22:4)	PE	3373600	3395400	3615200	3113900	3700400	2501600	1842000	2563200	2834200	2840400	2338100	2366400
10.195	852.648	711.658	LIPID-P-0619	PE(22:4/22:0)	PE	15180	18869	30491	24658	15767	16810	10802	9950.3	19784	7474.3	10532	9124
8.05	822.601	681.593	LIPID-P-0623	PE(22:1/20:4)	PE	40622	44314	58340	66300	45315	68306	63676	53827	49108	66765	30125	23901
9.6	850.633	709.625	LIPID-P-0624	PE(22:2/22:3)	PE	33168	33531	30877	33620	26817	25013	23988	24941	28701	31230	20372	20956
5.55	736.492	595.484	LIPID-P-0625	PE(14:0/22:6)	PE	605790	226410	619130	261020	448500	320820	222420	316730	342190	472340	281600	353280
6.13	764.523	623.515	LIPID-P-0628	PE(16:0/22:6)	PE	145810000	121770000	151220000	119910000	129930000	119310000	106180000	141990000	144550000	138550000	127810000	130820000
6.885	792.554	293	LIPID-P-0629	PE(20:1/20:5)	PE	151510	187660	185140	186880	228370	168540	156380	222520	171110	197840	162880	200760
6.9	792.554	651.547	LIPID-P-0631	PE(18:0/22:6)	PE	36593000	35943000	46705000	40197000	47400000	41786000	31767000	48780000	44251000	49146000	41352000	45342000
7.755	820.586	679.578	LIPID-P-0633	PE(22:6/20:0)	PE	187500	154870	160420	148440	129720	123890	106310	132800	167220	134980	147450	150200
5.695	788.523	647.515	LIPID-P-0637	PE(20:3/20:5)	PE	1949600	2219600	2886100	3126700	2036700	1849700	1818800	2103700	2467100	2026500	1313200	1305600
7.715	704.559	563.552	LIPID-P-0638	PE(P-18:0/16:0)	PE-P	388580	374010	346930	613780	648610	719560	907300	1022800	897420	767430	597610	518660
9.125	732.591	591.583	LIPID-P-0639	PE(P-18:0/18:0)	PE-P	97420	159630	121630	158130	272030	286510	319420	421680	238230	356720	191320	68863
9.955	760.622	619.614	LIPID-P-0640	PE(P-18:0/20:0)	PE-P	62121	70675	107560	86948	176120	125810	131890	201570	164590	141350	123570	107970
7.96	730.575	589.567	LIPID-P-0643	PE(P-18:1/18:0)	PE-P	117280	198960	133180	234970	202450	273760	250210	397980	302430	219100	137500	148710
9.61	758.606	617.599	LIPID-P-0644	PE(P-18:1/20:0)	PE-P	118230	117140	131980	180870	312490	179000	221510	326670	246840	256380	197340	136320
6.44	700.528	559.52	LIPID-P-0646	PE(P-18:2/16:0)	PE-P	19576	10621	19350	27368	13839	37164	56931	38952	37161	66197	25111	34354
7.92	756.591	615.583	LIPID-P-0648	PE(P-18:2/20:0)	PE-P	62554	91788	93794	50236	187430	136750	149260	210780	149350	118600	110770	71755
8.91	784.622	643.614	LIPID-P-0649	PE(P-20:2/20:0)	PE-P	13772	19142	44779	18528	24913	14296	23640	38424	29612	29210	19294	15255
6.8	726.544	585.536	LIPID-P-0652	PE(P-18:2/18:1)	PE-P	404210	665430	345480	898150	467360	700410	635730	765670	859870	506350	488820	373280
7.485	754.575	613.567	LIPID-P-0653	PE(P-18:2/20:1)	PE-P	951770	1754700	1339300	2475900	1503800	1409600	1568400	2080600	2031600	1461500	1181500	912370
7.97	782.606	641.599	LIPID-P-0654	PE(P-20:2/20:1)	PE-P	377730	683310	604400	711740	427280	347120	345160	521170	503640	479810	316160	216580
6.625	724.528	583.52	LIPID-P-0657	PE(P-18:2/18:2)	PE-P	775470	1227400	691970	1058200	1189800	1089600	1023600	1386500	1161000	1158700	901840	825090
6.83	752.559	611.552	LIPID-P-0658	PE(P-18:2/20:2)	PE-P	462210	668440	437940	956200	538100	803160	666170	1054000	874490	619500	487890	521050
7.525	780.591	639.583	LIPID-P-0659	PE(P-20:2/20:2)	PE-P	164560	180470	161320	169000	204760	168050	146270	241650	256630	134220	154420	153440
6.57	750.544	609.536	LIPID-P-0662	PE(P-18:2/20:3)	PE-P	1148500	1451700	1076100	1571700	1593000	1523700	1521000	1875400	1539100	1564200	1191300	1048800
7.585	778.575	637.567	LIPID-P-0663	PE(P-20:2/20:3)	PE-P	97502	148570	279130	321090	234550	148540	73146	194280	178150	217630	87413	80231
8.76	806.606	665.599	LIPID-P-0664	PE(P-20:2/22:3)	PE-P	32097	42481	58836	55214	83450	46923	40861	76306	48361	73183	47718	42906
6.43	748.528	607.52	LIPID-P-0666	PE(P-18:2/20:4)	PE-P	282310	211170	199750	266650	176120	171430	137420	225870	208910	212940	140560	112830
6.595	776.559	635.552	LIPID-P-0667	PE(P-20:2/20:4)	PE-P	409840	454180	333180	455410	410910	342210	356210	438530	341020	352100	267130	260710
6.475	774.544	633.536	LIPID-P-0670	PE(P-20:2/20:5)	PE-P	100990	99109	71511	66239	48398	41896	51638	52198	52107	71906	28210	45732
5.885	772.528	631.52	LIPID-P-0673	PE(P-20:2/20:6)	PE-P	67290	64871	90936	38439	23304	15987	20878	26614	19841	13093	22503	29194
6.515	800.559	659.552	LIPID-P-0674	PE(P-20:2/22:6)	PE-P	33737	36248	43691	26388	20921	6838.2	5859.2	29807	16927	16046	9339	10638
6.325	749.533	577.525	LIPID-P-0678	PG(16:0/18:1)	PG	26597	28797	47083	17632	33073	12662	25283	40406	32833	30416	30412	36882
7.07	790.56	605.552	LIPID-P-0690	PS(18:1/18:0)	PS	505770	477000	538290	366900	1302800	1226500	618360	1436700	973210	1134400	1410200	2267900
5.7	760.513	575.505	LIPID-P-0694	PS(18:2/16:0)	PS	135990	73292	105920	81427	394250	341750	298590	505220	251000	395280	269070	447140
6.515	788.544	603.536	LIPID-P-0695	PS(18:0/18:2)	PS	809880	946970	851870	878130	1828100	2438400	1828400	2138600	1783500	3199800	1407900	2513400
6.54	814.56	629.552	LIPID-P-0701	PS(20:3/18:0)	PS	498190	583980	597360	440250	1128100	1304400	909190	1372100	1213200	1598700	1061400	1538400
5.62	784.513	599.505	LIPID-P-0704	PS(16:0/20:4)	PS	1831500	1734100	2049400	1206600	3586100	2240100	2149300	2571700	3443900	3502100	3439600	4630700
6.24	812.544	627.536	LIPID-P-0705	PS(18:0/20:4)	PS	4370700	4440000	3568400	3789300	5283300	10068000	3152200	7249100	4757700	7171600	8027400	7563600
5.52	808.513	623.505	LIPID-P-0711	PS(22:6/16:0)	PS	1024400	679320	978400	644120	2404300	1177100	942310	1500600	1730400	1801600	1653800	2331200
6.135	836.544	651.536	LIPID-P-0712	PS(18:0/22:6)	PS	796440	714910	559020	579570	1786100	1569900	1083800	2800400	594010	1871500	1549400	1712000
5.61	677.56	184	LIPID-P-0717	SM(d18:0/14:0)	SM	75027	150880	242730	128740	44850	97193	56459	136040	74258	100950	74465	66191
6.205	705.591	184	LIPID-P-0718	SM(d18:0/16:0)	SM	50427	88436	113420	70911	37836	71626	62749	76400	24357	63250	52090	43261
7.02	733.622	184	LIPID-P-0719	SM(d18:0/18:0)	SM	2006700	2559500	3669200	2759200	2145100	2106100	2242500	3988300	1985500	5369900	1882700	1614500
9.5	789.685	184	LIPID-P-0721	SM(d18:0/22:0)	SM	3830400	4756400	6383300	3605500	2010500	2128900	2277900	3360100	2644100	2497600	2073000	1268200
10.45	817.716	184	LIPID-P-0722	SM(d18:0/24:0)	SM	41450000	36393000	46038000	42573000	44876000	36756000	29307000	40047000	33860000	40538000	27186000	27266000
10.86	845.748	184	LIPID-P-0723	SM(d18:0/26:0)	SM	878470	817260	936710	814530	1029600	689200	965940	1155200	954570	1156500	728730	792930
5.035	647.513	184	LIPID-P-0724	SM(d18:1/12:0)	SM	55116	67676	75300	93731	43168	61834	63013	61190	54945	56959	47199	46656
5.43	675.544	184	LIPID-P-0725	SM(d18:1/14:0)	SM	4945300	5686300	7317600	7095800	3362600	5218500	4565200	3343200	3049400	3671400	3448100	3250300
5.96	703.575	184	LIPID-P-0726	SM(d18:1/16:0)	SM	2730300	2950000	2981400	3285900	3732700	4769000	3654700	3472400	3287600	3600900	2959800	3316800
6.04	731.607	184	LIPID-P-0727	SM(d18:0/18:1)	SM	142730	75350	134470	88694	159880	169890	217190	196510	128970	234780	125240	175620
6.69	731.607	184	LIPID-P-0728	SM(d18:1/18:0)	SM	43165000	43026000	55251000	46196000	51023000	61268000	50956000	64409000	53370000	62736000	40266000	48736000
7.8	759.638	184	LIPID-P-0729	SM(d18:1/20:0)	SM	41998000	42044000	52078000	46441000	62495000	54432000	50368000	63388000	51347000	56003000	48883000	49564000
9.33	787.669	184	LIPID-P-0730	SM(d18:1/22:0)	SM	327680000	312130000	313350000	318670000	338850000	290630000	272960000	346530000	296240000	295790000	255260000	217220000
10.065	815.701	184	LIPID-P-0731	SM(d18:1/24:0)	SM	504660000	465410000	484060000	456520000	460300000	411870000	449520000	518240000	446660000	420100000	351530000	345270000
9.99	843.732	184	LIPID-P-0732	SM(d20:0/24:1)	SM	6506000	6763400	6884400	6725100	9527700	6045300	7681600	8705800	7383400	7871300	4925500	6605500
10.455	843.732	184	LIPID-P-0733	SM(d18:1/26:0)	SM	6915300	7561600	7016900	6437400	7830000	6751100	7401500	9873400	8068000	7925600	6109100	5714800
5.095	673.528	184	LIPID-P-0734	SM(d18:2/14:0)	SM	166690	205020	235170	229310	94176	170830	108560	125640	100290	100590	102400	96678
5.515	701.56	184	LIPID-P-0735	SM(d18:1/16:1)	SM	15168000	16274000	18256000	20389000	20006000	23056000	17432000	17475000	14735000	15938000	12506000	13697000
6.045	729.591	184	LIPID-P-0736	SM(d18:1/18:1)	SM	1074800	949850	1639800	1549700	1564600	1802400	1797500	2365000	1658000	1930500	1186800	1306100
6.895	757.622	184	LIPID-P-0737	SM(d18:1/20:1)	SM	654730	425550	640030	815320	1087000	839370	932880	1261600	1062300	886110	742890	945830
7.735	785.654	184	LIPID-P-0738	SM(d18:1/22:1)	SM	13054000	9546500	14567000	15189000	15231000	15051000	12046000	14245000	14281000	12376000	11733000	12335000
9.115	813.685	184	LIPID-P-0739	SM(d18:1/24:1)	SM	1971600	1956300	2485000	2001200	2690600	2585500	2230400	2714000	2556300	2991600	2180900	1833500
9.995	841.716	184	LIPID-P-0740	SM(d18:1/26:1)	SM	4234400	5238700	5574000	4946700	7904700	6914100	6372800	7404600	6552200	7211000	5109900	6527300
5.245	699.544	184	LIPID-P-0741	SM(d18:2/16:1)	SM	27281	22710	36855	32689	24563	34366	17678	32175	13576	21820	17638	14151
7.92	811.669	184	LIPID-P-0745	SM(d18:2/24:1)	SM	45712000	56714000	57067000	67163000	49584000	50941000	43957000	52962000	54552000	46093000	51989000	40459000
9.365	839.701	184	LIPID-P-0746	SM(d18:2/26:1)	SM	687680	789070	979820	1022800	1027000	878870	820190	970300	983600	950010	620180	742760
11.45	768.708	495.674	LIPID-P-0748	TG(14:0/14:0/16:0)	TG	159700	345840	277880	404420	152960	174640	218670	185730	228470	199530	143930	149500
11.9	796.739	523.705	LIPID-P-0750	TG(14:0/16:0/16:0)	TG	1020700	3558600	2017300	4047100	517250	805490	801940	545390	845360	385450	481860	513880
12.45	824.771	551.736	LIPID-P-0751	TG(14:0/16:0/18:0)	TG	12365000	40251000	30627000	54459000	12898000	13551000	15597000	9667700	15088000	9738400	12805000	12098000
13.06	852.802	579.768	LIPID-P-0754	TG(16:0/16:0/18:0)	TG	4309800	10778000	10770000	8989400	7010500	10961000	10561000	9324700	12743000	10851000	9560400	5683600
13.065	852.802	551.768	LIPID-P-0755	TG(14:0/18:0/18:0)	TG	2471000	4957500	5036400	4714900	3997200	4796400	4863800	5610900	6089200	5511800	4393500	2919600
13.7	880.833	607.799	LIPID-P-0757	TG(14:0/16:0/22:0)	TG	447410	858700	1116400	815190	652180	731500	774570	1051200	1456500	1552300	689710	538090
13.705	880.833	579.799	LIPID-P-0760	TG(14:0/18:0/20:0)	TG	993370	1903200	2551500	2117400	980000	1562800	1440100	1766100	2521100	3362000	1360000	905760
14.335	908.865	579.83	LIPID-P-0762	TG(14:0/20:0/20:0)	TG	27512	44629	74243	48206	35435	41872	40060	64557	89090	88678	39026	25944
14.345	908.865	635.83	LIPID-P-0764	TG(16:0/16:0/22:0)	TG	35516	54305	91223	62738	56052	50613	32846	55736	90899	93204	51292	35266
14.345	908.865	607.83	LIPID-P-0765	TG(18:0/18:0/18:0)	TG	183090	359040	459440	321440	144660	226050	275270	278590	437270	546380	232150	186920
11.04	766.692	493.658	LIPID-P-0780	TG(12:0/16:0/16:1)	TG	288140	697850	473890	471800	541000	1337300	1378700	849440	834710	671270	1056300	900270
11.045	766.692	467.658	LIPID-P-0781	TG(12:0/14:0/18:1)	TG	172130	236470	263320	205270	430080	987910	1223100	591240	560440	462190	932990	756400
11.435	794.724	549.689	LIPID-P-0782	TG(14:0/14:0/18:1)	TG	1199200	2714300	1696000	2479200	722040	1616400	2366800	801350	1556900	520670	2127400	1651600
11.44	794.724	521.689	LIPID-P-0783	TG(14:0/16:0/16:1)	TG	1664100	3138500	2881900	2773300	1334000	2365000	3612300	1490500	2356800	1430900	2700300	2429600
11.87	822.755	577.721	LIPID-P-0786	TG(14:0/14:0/20:1)	TG	4410000	6485500	5313200	6474800	6530100	8915400	9219000	11184000	7360700	5200400	7494400	6830100
11.87	822.755	523.721	LIPID-P-0787	TG(14:0/16:0/18:1)	TG	4773400	8832500	5394700	6528200	6252900	10181000	10692000	9910400	8439100	4471800	9398700	7460200
11.875	822.755	549.721	LIPID-P-0788	TG(16:0/16:0/16:1)	TG	14503000	36334000	32980000	36807000	11242000	20190000	24010000	21902000	19818000	9036600	19581000	16280000
12.41	850.786	577.752	LIPID-P-0789	TG(16:0/16:0/18:1)	TG	1303700	2538300	2391800	2604000	5814300	6902700	6346100	5949100	6261600	2592000	5599400	4725500
12.415	850.786	551.752	LIPID-P-0790	TG(14:0/18:0/18:1)	TG	27927000	55386000	44522000	65762000	86814000	105400000	86498000	87652000	109110000	47009000	91698000	72906000
12.46	850.786	579.752	LIPID-P-0793	TG(14:0/16:1/20:0)	TG	682150	1176100	1513700	1531500	625140	779990	895910	664650	794930	452660	875630	585820
13.015	878.818	605.783	LIPID-P-0795	TG(16:0/16:1/20:0)	TG	7156700	13768000	12922000	12306000	51976000	57121000	47146000	41572000	47529000	29131000	52515000	29054000
13.015	878.818	579.783	LIPID-P-0796	TG(14:0/18:1/20:0)	TG	5854300	11200000	12279000	12137000	37892000	53954000	34800000	38099000	43893000	23959000	43278000	27610000
13.015	878.818	577.783	LIPID-P-0797	TG(14:0/18:0/20:1)	TG	8212700	17123000	15465000	14318000	37563000	51488000	39979000	41158000	40645000	26963000	46499000	32576000
13.62	906.849	551.815	LIPID-P-0801	TG(14:0/18:0/22:1)	TG	34480	51175	39459	51453	95003	84056	86391	75992	142940	59410	105830	52898
13.665	906.849	633.815	LIPID-P-0803	TG(16:0/16:1/22:0)	TG	283790	466840	422410	538010	2282800	2452400	2467200	2015200	2786600	1075700	2493500	1442900
13.675	906.849	607.815	LIPID-P-0805	TG(18:0/18:0/18:1)	TG	510540	765820	907910	1068200	3090000	3058300	2516800	3043000	3701900	2240900	2870700	1559700
13.695	906.849	577.815	LIPID-P-0807	TG(14:0/20:0/20:1)	TG	259610	275590	291960	310960	2460500	2699300	2886000	2056900	2472700	1045000	2338900	1640900
14.285	934.88	605.846	LIPID-P-0812	TG(14:0/20:0/22:1)	TG	30836	44092	55385	68230	136000	87270	110880	111640	166390	74379	90706	45308
14.3	934.88	635.846	LIPID-P-0814	TG(16:0/18:1/22:0)	TG	40161	59673	65167	59140	154310	104860	147580	89800	181680	87063	100910	55203
14.305	934.88	661.846	LIPID-P-0815	TG(16:0/18:0/22:1)	TG	15543	34175	25613	12866	69372	50147	75164	36133	56136	33148	31426	27603
14.315	934.88	577.846	LIPID-P-0817	TG(14:0/20:1/22:0)	TG	72038	110600	64250	72546	218980	202020	241880	164090	255430	101250	182360	93716
14.98	962.912	605.877	LIPID-P-0822	TG(14:0/22:0/22:1)	TG	11266	10757	15229	14845	17850	11078	11715	20943	32748	18069	10823	6161.2
14.995	962.912	663.877	LIPID-P-0824	TG(18:1/20:0/20:0)	TG	14708	18336	19592	22411	53414	38883	37775	31702	49846	27157	43378	18598
10.445	736.646	439.611	LIPID-P-0833	TG(12:0/12:0/18:2)	TG	178860	232250	194160	141350	364270	688970	686760	422260	239660	712460	320060	428410
10.765	764.677	491.642	LIPID-P-0834	TG(14:1/14:1/16:0)	TG	276590	506330	488810	267380	819800	1473300	1563000	1070900	824950	973290	946550	957780
11.045	792.708	521.674	LIPID-P-0835	TG(14:1/16:0/16:1)	TG	990250	2010500	1663100	1741500	553170	2345500	2669200	766200	1086600	414090	3288600	1979600
11.045	792.708	493.674	LIPID-P-0836	TG(14:0/14:1/18:1)	TG	291140	436900	347520	344280	820290	2200000	1948700	1282200	1284400	777850	1682100	1449100
11.08	792.708	547.674	LIPID-P-0837	TG(14:0/14:0/18:2)	TG	590420	937600	763180	856090	526460	2194400	2055300	627510	884370	451570	2402100	1581700
11.435	820.739	521.705	LIPID-P-0840	TG(14:0/16:1/18:1)	TG	3800800	5531800	4528200	4492100	5289100	15732000	18141000	7858400	11807000	3860100	18230000	12729000
11.485	820.739	547.705	LIPID-P-0842	TG(16:0/16:1/16:1)	TG	10930000	16799000	14216000	17349000	8445100	19380000	20881000	10276000	14683000	7029000	23978000	16530000
11.495	820.739	523.705	LIPID-P-0844	TG(14:0/16:0/18:2)	TG	3568100	4611400	3216900	4142600	5838800	8751200	7603200	4853500	7045600	4503600	7661000	7032500
11.855	848.771	549.736	LIPID-P-0846	TG(14:0/18:1/18:1)	TG	50772000	72268000	56692000	55820000	87599000	141550000	166750000	146510000	125860000	49288000	162980000	137270000
11.95	848.771	575.736	LIPID-P-0848	TG(16:0/16:1/18:1)	TG	102070000	147650000	127520000	147980000	172240000	241210000	204010000	196130000	205220000	104180000	226930000	169510000
11.975	848.771	551.736	LIPID-P-0849	TG(14:0/18:0/18:2)	TG	28476000	36771000	27386000	34756000	53968000	60191000	42759000	50883000	50676000	32008000	44865000	41694000
12.38	876.802	577.768	LIPID-P-0853	TG(14:0/18:1/20:1)	TG	3839900	4206900	4161900	4078800	18068000	32101000	29746000	22250000	25465000	9814800	26760000	25121000
12.39	876.802	603.768	LIPID-P-0854	TG(16:0/16:1/20:1)	TG	2145400	2178800	2285800	1988500	9132100	17577000	12718000	11325000	11893000	5534000	14538000	12793000
12.52	876.802	575.768	LIPID-P-0856	TG(14:0/18:0/20:2)	TG	6764600	9471200	9250500	9610800	26086000	29960000	24539000	29612000	22214000	18410000	21469000	17165000
12.925	904.833	631.799	LIPID-P-0858	TG(16:0/16:1/22:1)	TG	3163700	4023100	2200600	2521300	23717000	28440000	28242000	25452000	28091000	9854300	36189000	29173000
12.93	904.833	577.799	LIPID-P-0859	TG(14:0/20:1/20:1)	TG	5999100	6646600	3878400	4304700	40141000	44148000	48695000	41572000	43858000	15760000	54322000	45985000
12.96	904.833	605.799	LIPID-P-0860	TG(16:1/18:1/20:0)	TG	10541000	14736000	15315000	12048000	104510000	122910000	85353000	97391000	78546000	43090000	99461000	72145000
12.97	904.833	603.799	LIPID-P-0861	TG(18:0/18:1/18:1)	TG	2924100	4266700	5568700	4996000	27904000	37072000	29323000	31672000	24068000	16900000	35082000	22057000
13.14	904.833	607.799	LIPID-P-0863	TG(14:0/18:2/22:0)	TG	457540	557350	609800	438390	2539700	3274100	2171200	2477700	2302000	1888500	2266400	1701100
13.145	904.833	575.799	LIPID-P-0864	TG(14:0/20:0/20:2)	TG	182340	302650	157340	222690	1260100	1659200	1542500	1255500	1352500	728270	1417600	944830
13.55	932.865	605.83	LIPID-P-0865	TG(14:0/20:1/22:1)	TG	191670	288800	358730	200550	2168700	1910500	1658300	2151200	2151600	1041200	2383100	1545100
13.585	932.865	631.83	LIPID-P-0868	TG(18:0/18:2/20:0)	TG	117500	107600	203820	113650	1279200	1140800	920280	1031100	1030900	607010	1334700	847820
13.615	932.865	633.83	LIPID-P-0869	TG(18:1/18:1/20:0)	TG	390650	389460	445630	342240	5529700	3436100	4251600	3910100	3412800	1730300	4241300	2690900
13.725	932.865	607.83	LIPID-P-0872	TG(14:0/20:2/22:0)	TG	10666	14879	18376	21893	39670	25827	35724	41671	60078	45284	28666	25142
13.8	932.865	635.83	LIPID-P-0874	TG(16:0/18:2/22:0)	TG	38290	31652	27122	49295	138730	137460	118520	100700	89910	85899	96237	66083
14.15	960.896	687.862	LIPID-P-0875	TG(16:0/20:2/22:0)	TG	7326.5	10418	11343	11958	62679	52486	54578	32418	49874	28551	48531	40448
14.16	960.896	605.862	LIPID-P-0876	TG(14:0/22:1/22:1)	TG	18631	17254	34490	25944	55860	49898	41011	60483	69292	51644	59999	40640
14.22	960.896	633.862	LIPID-P-0878	TG(18:0/20:1/20:1)	TG	8693.8	17010	21360	16417	85658	46314	41093	76743	62584	37807	48957	41230
14.25	960.896	661.862	LIPID-P-0879	TG(18:1/18:1/22:0)	TG	64075	25743	60589	35802	277210	146110	186930	186550	211030	94054	176170	116050
14.25	960.896	631.862	LIPID-P-0880	TG(18:2/20:0/20:0)	TG	3524.9	2202.5	3471.9	8378.3	65282	16005	23736	40515	38407	19845	35964	20496
14.255	960.896	603.862	LIPID-P-0881	TG(14:0/22:0/22:2)	TG	64577	34685	51378	30093	216490	114100	87927	130630	175000	72673	131970	53247
14.955	988.927	689.893	LIPID-P-0886	TG(18:1/20:1/22:0)	TG	5272.6	4983.6	11261	9670.6	84106	24824	32843	103300	41820	12479	49361	16735
15.035	988.927	715.893	LIPID-P-0890	TG(16:0/22:1/22:1)	TG	4534.4	3671.5	2249.7	2298.7	25532	18987	20012	12839	18157	11298	17727	13158
10.49	762.661	465.627	LIPID-P-0893	TG(12:0/14:1/18:2)	TG	29404	39254	44018	35061	42764	256580	163370	56288	98872	148830	61847	66288
10.74	790.692	491.658	LIPID-P-0894	TG(14:1/14:1/18:1)	TG	96674	107540	172920	91418	498420	846490	803250	658200	525390	404490	441240	574110
10.76	790.692	493.658	LIPID-P-0895	TG(14:0/14:1/18:2)	TG	298760	340920	433520	296080	750270	1619100	1453800	901280	810840	782160	919830	1298700
10.82	790.692	517.658	LIPID-P-0896	TG(12:0/16:0/18:3)	TG	263890	282890	361680	206160	427550	670260	693770	598640	496190	487100	337790	609880
11.09	818.724	519.689	LIPID-P-0899	TG(14:1/16:1/18:1)	TG	716800	579340	652010	563430	2667800	4694100	5839800	3253700	3296700	2054200	3543300	3872300
11.095	818.724	573.689	LIPID-P-0901	TG(14:0/16:1/18:2)	TG	2445400	2459700	1919400	1878300	2042200	7741400	7763900	2981000	4404400	1443800	8929500	6188300
11.14	818.724	545.689	LIPID-P-0902	TG(14:0/16:0/18:3)	TG	1529300	2015500	1852100	1411800	1900100	5077300	5077800	2478100	2978600	1701400	3984600	4210000
11.225	818.724	523.689	LIPID-P-0903	TG(12:0/18:0/18:3)	TG	136350	239700	209530	242400	280600	897920	680060	360970	462230	260480	597690	562820
11.45	846.755	603.721	LIPID-P-0904	TG(14:1/14:1/22:1)	TG	261410	321970	275310	306060	909990	1737300	2203200	1104400	1224500	590560	1953100	977480
11.47	846.755	601.721	LIPID-P-0906	TG(14:0/18:1/18:2)	TG	10321000	9312100	6165800	7908500	27353000	52754000	44477000	24721000	33580000	21628000	52046000	40781000
11.49	846.755	575.721	LIPID-P-0907	TG(16:0/16:1/18:2)	TG	38185000	63763000	60512000	52989000	39365000	94582000	101010000	49749000	61338000	27197000	107110000	81296000
11.665	846.755	551.721	LIPID-P-0910	TG(14:0/18:0/18:3)	TG	963660	2014400	1865000	1482800	3273700	5465600	4324900	3069300	3987800	1731200	4021500	2967400
11.9	874.786	629.752	LIPID-P-0911	TG(14:0/18:2/20:1)	TG	157100	133490	81800	112700	373380	451810	507720	489740	341930	280660	595010	531020
11.935	874.786	575.752	LIPID-P-0913	TG(14:0/18:1/20:2)	TG	2283500	2934000	2881500	2271300	8459400	15583000	12871000	12983000	9529800	5018900	14364000	13107000
11.94	874.786	549.752	LIPID-P-0914	TG(16:0/16:1/20:2)	TG	659730	702320	445780	560740	1342400	1688600	1850400	1761600	1600200	800490	1751500	1914900
11.945	874.786	545.752	LIPID-P-0916	TG(14:0/18:3/20:0)	TG	287660	272570	301290	255500	749820	1106400	904750	898800	834460	594280	1112200	1071200
12.075	874.786	573.752	LIPID-P-0918	TG(14:0/18:0/20:3)	TG	720300	766610	883010	786820	987090	1342900	1072500	937030	825530	738160	1385800	1226700
12.445	902.818	629.783	LIPID-P-0921	TG(16:0/16:0/22:3)	TG	4238900	4686100	2777100	3204800	18281000	26238000	20381000	20580000	22132000	9135700	23369000	25021000
12.445	902.818	631.783	LIPID-P-0922	TG(16:1/18:2/20:0)	TG	210530	262580	165420	174470	833410	1037100	1152700	1077800	854590	357650	1386100	1101300
12.45	902.818	575.783	LIPID-P-0924	TG(14:0/20:1/20:2)	TG	3176100	3859100	2259400	2557800	13217000	15182000	12958000	13275000	12706000	6976600	16007000	15763000
12.49	902.818	601.783	LIPID-P-0928	TG(18:0/18:1/18:2)	TG	7442200	7988400	8425300	7030500	47934000	54397000	39647000	53829000	34779000	28867000	39672000	35286000
12.49	902.818	545.783	LIPID-P-0929	TG(14:0/18:3/22:0)	TG	9448.9	16110	21806	13508	87779	109500	60634	67555	79042	32981	62754	80375
12.89	930.849	603.815	LIPID-P-0932	TG(14:0/20:1/22:2)	TG	1478600	1573000	1692000	1430300	30468000	22209000	21737000	25669000	21289000	10024000	29113000	18883000
13.05	930.849	629.815	LIPID-P-0937	TG(16:0/18:0/22:3)	TG	167970	160890	193580	200060	1510800	1385200	1287700	1655400	931570	678430	1489000	1265700
13.05	930.849	605.815	LIPID-P-0938	TG(14:0/20:2/22:1)	TG	133210	126620	157150	134330	1238400	1119000	921570	1559900	1032400	589170	1023600	905580
13.095	930.849	633.815	LIPID-P-0939	TG(18:1/18:2/20:0)	TG	239300	213050	221570	202990	2585400	1763800	1819200	2326100	1571600	953630	1779000	1534700
13.105	930.849	601.815	LIPID-P-0940	TG(14:0/20:0/22:3)	TG	169380	110180	123180	159730	3047400	1831200	1820800	2016700	1351100	748300	2021400	1139100
13.525	958.88	603.846	LIPID-P-0942	TG(14:0/22:1/22:2)	TG	39449	35735	61870	33094	954980	538540	682160	765010	527250	193550	795330	467820
13.685	958.88	629.846	LIPID-P-0948	TG(16:0/20:0/22:3)	TG	5411.9	6540.1	8009.4	4477.7	75710	39411	47435	64838	41378	19885	57590	39309
13.69	958.88	661.846	LIPID-P-0949	TG(18:2/20:0/20:1)	TG	31268	17226	23132	21503	195050	122220	92798	104540	81893	67805	102510	61713
13.735	958.88	601.846	LIPID-P-0950	TG(16:1/20:2/22:0)	TG	64753	38884	43810	40409	303720	187260	147970	189260	156480	98055	174590	94747
13.765	958.88	659.846	LIPID-P-0951	TG(18:1/20:1/20:1)	TG	40184	44312	66983	35770	853620	400090	458100	576730	502090	178510	667430	440410
10.485	788.677	491.642	LIPID-P-0969	TG(14:1/14:1/18:2)	TG	74135	39365	59609	51451	217390	339000	289050	239780	198930	204940	151350	210240
10.77	816.708	599.674	LIPID-P-0970	TG(12:0/18:2/18:2)	TG	165990	126840	121080	131310	617500	1291200	865640	656220	466840	584700	565150	1073400
10.81	816.708	517.674	LIPID-P-0972	TG(12:0/18:1/18:3)	TG	68856	67159	97152	80030	362650	668390	547320	331160	331940	347700	270850	381680
10.825	816.708	573.674	LIPID-P-0974	TG(14:1/14:1/20:2)	TG	242580	215010	291330	224690	267340	941260	919480	401970	397600	282550	594340	631990
10.855	816.708	521.674	LIPID-P-0976	TG(14:0/16:1/18:3)	TG	228030	140080	210400	225700	266070	1290600	1023600	439400	516150	230070	879340	1015900
11.14	844.739	523.705	LIPID-P-0978	TG(14:0/16:0/20:4)	TG	451270	495740	458600	482640	392950	749930	464620	522210	389760	619400	313230	535430
11.14	844.739	547.705	LIPID-P-0979	TG(16:1/16:1/18:2)	TG	10836000	9174100	7537000	9359300	24826000	57343000	37723000	24650000	24393000	16916000	42056000	38808000
11.15	844.739	601.705	LIPID-P-0981	TG(14:1/14:1/22:2)	TG	499250	460920	494180	396250	1927000	2637900	2950200	1881500	1714800	1123600	2214900	2501200
11.21	844.739	571.705	LIPID-P-0983	TG(16:0/16:1/18:3)	TG	1959300	3178900	2657500	2861400	2994000	8671100	7542400	4903500	4716600	2749100	7586900	6287900
11.21	844.739	549.705	LIPID-P-0984	TG(14:0/18:1/18:3)	TG	2073600	2888000	3355500	2994000	5098900	11910000	9755900	6012500	6455900	2864100	12112000	9221000
11.505	872.771	573.736	LIPID-P-0985	TG(14:0/18:1/20:3)	TG	31544000	32102000	33551000	31476000	73328000	140610000	124410000	85066000	103800000	49257000	143780000	122190000
11.555	872.771	575.736	LIPID-P-0987	TG(14:0/18:2/20:2)	TG	1553000	2189300	1716300	2042200	4819200	10743000	6298900	5527200	5487800	3497700	6003800	6692100
11.555	872.771	627.736	LIPID-P-0988	TG(14:0/16:0/22:4)	TG	170500	138540	131830	68381	630330	852270	779020	472030	347000	343680	591460	762180
11.805	872.771	551.736	LIPID-P-0991	TG(14:0/18:0/20:4)	TG	2780000	4060300	3235200	4105900	4817400	5650200	3639700	4067700	3027300	3109700	2527800	3339000
11.91	900.802	603.768	LIPID-P-0993	TG(18:1/18:1/18:2)	TG	20522000	22201000	25220000	26637000	185930000	173540000	138840000	170830000	131210000	91915000	130610000	128560000
11.99	900.802	573.768	LIPID-P-0995	TG(14:0/20:1/20:3)	TG	336960	365930	306200	258960	1296400	1524200	1409600	1083200	1107900	606080	1416600	1592100
12.02	900.802	575.768	LIPID-P-0996	TG(14:0/20:2/20:2)	TG	2646300	2110800	1450400	1508500	8063700	11274000	7374100	8269800	6718300	3947800	7916900	10076000
12.035	900.802	627.768	LIPID-P-0997	TG(16:0/16:1/22:3)	TG	3866800	3799800	2462100	2195400	21989000	24146000	19373000	21486000	18084000	9121600	18257000	21572000
12.045	900.802	599.768	LIPID-P-0998	TG(14:0/18:0/22:4)	TG	2195200	1784000	2596000	3147900	13658000	19715000	9146900	12453000	7139500	8130300	7491100	9488700
12.11	900.802	605.768	LIPID-P-1000	TG(14:0/18:3/22:1)	TG	436180	384580	356360	470010	2344900	3808000	2135000	2725300	1627700	1196900	2088700	2246400
12.315	900.802	579.768	LIPID-P-1002	TG(14:0/20:0/20:4)	TG	944530	1198300	1336800	1301800	1677900	1755800	925440	1554000	1026200	1603300	816170	952120
12.43	928.833	601.799	LIPID-P-1005	TG(16:1/20:1/20:2)	TG	1445600	1047900	1097500	1048600	13885000	8420300	8007600	11148000	7315800	5278100	9712300	9767500
12.445	928.833	631.799	LIPID-P-1006	TG(18:2/18:2/20:0)	TG	631320	527680	489250	436020	6191700	4064200	3705300	4780900	3681200	2438600	4170000	4320100
12.495	928.833	575.799	LIPID-P-1009	TG(14:0/20:2/22:2)	TG	97221	78528	36953	36608	236260	227310	246760	226060	195810	119080	257830	249870
12.5	928.833	607.799	LIPID-P-1010	TG(14:0/20:4/22:0)	TG	229330	257190	380880	223220	724940	1054000	636720	709150	522310	556150	518430	707100
12.565	928.833	577.799	LIPID-P-1011	TG(12:0/22:1/22:3)	TG	678540	565570	319230	281960	2775600	2387800	2288300	2421100	2195700	862060	2517800	2695200
12.58	928.833	627.799	LIPID-P-1012	TG(18:0/18:3/20:1)	TG	190670	173270	247130	145740	2860800	2349900	2198300	2568400	1508900	1230500	1473400	2241500
12.585	928.833	605.799	LIPID-P-1013	TG(14:0/20:3/22:1)	TG	217170	220040	265690	117550	3355600	2953900	2124100	2713400	1386300	1185800	1678900	2199400
12.61	928.833	599.799	LIPID-P-1014	TG(18:1/18:3/20:0)	TG	64286	64525	29018	43661	610580	389040	298870	430610	308180	175130	395890	385540
12.955	956.865	629.83	LIPID-P-1017	TG(18:1/20:1/20:2)	TG	48979	51963	36004	33376	850970	466240	477950	795740	528160	218510	638670	574290
12.98	956.865	601.83	LIPID-P-1019	TG(14:0/22:1/22:3)	TG	56091	39246	58711	38774	757480	427450	447410	616130	372230	301200	493500	424590
12.985	956.865	659.83	LIPID-P-1020	TG(18:2/18:2/22:0)	TG	20333	8395.8	20701	22026	224860	133250	153100	163280	134870	87508	151540	123590
10.56	814.692	519.658	LIPID-P-1031	TG(14:1/16:1/18:3)	TG	20322	20122	33394	19697	62973	201620	166930	102410	102500	73440	75274	171090
10.855	842.724	599.689	LIPID-P-1033	TG(14:1/14:1/22:3)	TG	215310	108430	162660	206340	575060	1283700	1135900	922510	637260	503470	870990	867740
10.88	842.724	545.689	LIPID-P-1034	TG(14:0/18:2/18:3)	TG	624380	278860	497810	670880	1527100	5364200	3161000	1789900	1801300	1230700	2353800	2639700
10.935	842.724	543.689	LIPID-P-1037	TG(14:0/18:1/18:4)	TG	74586	53461	114070	119740	428190	969720	557710	409790	274760	362400	576250	558740
10.96	842.724	521.689	LIPID-P-1038	TG(14:0/16:1/20:4)	TG	726270	506410	633580	514890	374090	750980	655320	365680	335160	434760	473420	428340
10.995	842.724	569.689	LIPID-P-1039	TG(16:0/16:1/18:4)	TG	292130	397890	411410	361200	563840	1578000	977760	640040	443940	522300	668100	602500
11.16	870.755	599.721	LIPID-P-1040	TG(16:1/16:1/20:3)	TG	10256000	8169800	8548100	8852700	23662000	51434000	40636000	22444000	25811000	11399000	40677000	39531000
11.205	870.755	571.721	LIPID-P-1041	TG(14:0/18:1/20:4)	TG	1759300	2083500	2272600	2003800	5719900	15503000	12547000	7446300	7237100	4398400	11745000	12075000
11.275	870.755	597.721	LIPID-P-1043	TG(16:0/16:1/20:4)	TG	8906000	13408000	11473000	12981000	22370000	65931000	43133000	22362000	29317000	18284000	45755000	45708000
11.28	870.755	575.721	LIPID-P-1044	TG(14:0/18:3/20:2)	TG	11264000	15952000	16656000	18403000	32805000	84257000	61185000	40510000	34015000	21676000	52897000	57221000
11.285	870.755	523.721	LIPID-P-1045	TG(14:0/16:0/22:5)	TG	223630	366470	393820	318260	713450	1562100	1318500	855800	869170	515250	980210	940840
11.33	870.755	577.721	LIPID-P-1047	TG(14:0/18:4/20:1)	TG	870580	1156600	1518800	1074100	4020200	8640700	7377500	4105600	3868100	2522800	5299600	5170200
11.535	898.786	601.752	LIPID-P-1049	TG(18:1/18:2/18:2)	TG	21295000	20448000	30709000	27038000	155890000	180960000	159200000	176090000	144520000	111800000	142710000	130160000
11.6	898.786	551.752	LIPID-P-1051	TG(16:0/16:0/22:5)	TG	476270	285690	259840	488460	1749600	1586200	1226700	876210	1136300	933940	1188100	1483300
11.61	898.786	603.752	LIPID-P-1052	TG(18:0/18:2/18:3)	TG	1760500	3040300	3502100	2974400	20856000	26908000	23702000	19743000	21208000	12663000	19473000	17866000
11.615	898.786	573.752	LIPID-P-1053	TG(14:0/20:2/20:3)	TG	447820	426180	280160	309780	1390000	2020500	1599800	1538100	1355200	838540	1754700	2041300
11.75	898.786	625.752	LIPID-P-1057	TG(16:0/16:1/22:4)	TG	5107500	6511000	6524900	5828500	19354000	30128000	19353000	16950000	15413000	11885000	15577000	21603000
11.78	898.786	577.752	LIPID-P-1058	TG(14:0/20:1/20:4)	TG	21712000	38524000	31248000	29151000	59212000	79378000	56791000	42542000	41880000	37051000	49112000	50781000
11.99	926.818	629.783	LIPID-P-1059	TG(18:2/18:3/20:0)	TG	923620	788840	659310	661620	7128500	5088500	5055400	7332000	4020600	2993500	4356500	5679000
11.995	926.818	601.783	LIPID-P-1060	TG(18:0/18:3/20:2)	TG	744570	563710	450890	519570	5615600	5393100	4688600	6541200	4047100	2327100	4040700	5087200
12	926.818	599.783	LIPID-P-1061	TG(18:1/18:3/20:1)	TG	308540	324480	336610	327970	2938600	2390800	2037100	3493700	2189500	1529600	2243000	2474300
12.075	926.818	603.783	LIPID-P-1062	TG(14:0/20:3/22:2)	TG	1417900	1442700	1640000	1264500	22518000	16844000	15411000	20147000	12163000	8723000	12560000	12404000
12.125	926.818	653.783	LIPID-P-1064	TG(16:0/18:2/22:3)	TG	1392800	1198700	756650	651100	3372700	4330500	2693300	2533200	3452100	1741500	2943500	4429700
12.135	926.818	577.783	LIPID-P-1065	TG(14:0/20:1/22:4)	TG	4792900	4171600	3053400	3185700	15587000	15761000	12148000	14725000	11536000	6325200	12583000	13774000
12.28	926.818	605.783	LIPID-P-1066	TG(14:0/20:4/22:1)	TG	2713600	2617800	3442300	2703000	10382000	13185000	6035500	6131500	5630400	5734300	6848400	8787500
12.47	954.849	601.815	LIPID-P-1068	TG(14:1/22:2/22:2)	TG	15907	11354	11514	10168	198290	114090	135040	176540	125570	68450	125470	113740
12.535	954.849	603.815	LIPID-P-1072	TG(18:0/18:2/22:3)	TG	108370	56209	44634	34645	809980	398150	370780	603960	468090	183950	697950	489070
12.695	954.849	653.815	LIPID-P-1075	TG(18:0/20:2/20:3)	TG	43817	61712	87866	58643	236640	146250	120810	124360	109320	81249	71592	109080
12.695	954.849	605.815	LIPID-P-1076	TG(14:0/22:1/22:4)	TG	189900	196190	288430	219280	784100	455620	301330	569430	376530	307120	322730	353820
12.695	954.849	655.815	LIPID-P-1077	TG(18:1/20:2/20:2)	TG	47898	37835	16172	24332	608340	307440	304840	431620	304940	197080	313970	307550
12.855	954.849	633.815	LIPID-P-1078	TG(16:0/20:4/22:1)	TG	90158	81701	113840	68299	257800	348030	230320	230380	200400	159180	178150	211550
10.66	840.708	545.674	LIPID-P-1081	TG(14:0/18:3/18:3)	TG	34420	39714	41360	62106	90175	397080	237010	157540	116040	132610	174380	263530
10.68	840.708	543.674	LIPID-P-1082	TG(14:0/18:2/18:4)	TG	94456	82958	89189	76792	244290	542140	315610	290270	214730	266190	248650	313090
10.905	868.739	571.705	LIPID-P-1083	TG(14:0/18:2/20:4)	TG	768170	225090	834130	697280	1723600	5986000	4364700	1817800	1535000	1318400	2288200	3994300
10.925	868.739	573.705	LIPID-P-1085	TG(14:0/18:3/20:3)	TG	1536500	1558400	1878500	2019100	3579600	14404000	7598600	3997700	4568700	2614000	6382900	8330200
10.96	868.739	569.705	LIPID-P-1086	TG(16:1/18:1/18:4)	TG	171400	203190	316420	228120	710940	1762300	1072300	700150	592080	511930	1046400	958950
11.025	868.739	623.705	LIPID-P-1088	TG(14:0/16:0/22:6)	TG	287560	229830	168260	156420	300970	804860	454520	322370	252750	311090	362600	546700
11.025	868.739	595.705	LIPID-P-1089	TG(16:0/16:1/20:5)	TG	689480	740640	1298500	1161800	2093900	7186500	4098800	1974300	2159300	1681900	2629600	3373800
11.185	896.771	543.736	LIPID-P-1091	TG(14:0/18:4/22:2)	TG	38517	52599	41442	77023	297630	398790	240300	243500	230240	212120	222930	263050
11.2	896.771	551.736	LIPID-P-1092	TG(16:0/16:0/22:6)	TG	2751200	2308900	1852800	2572200	6143100	5671600	4464300	5347600	3558200	3153500	2620900	3054400
11.2	896.771	599.736	LIPID-P-1093	TG(18:2/18:2/18:2)	TG	9408000	11370000	13169000	15497000	72757000	88239000	53646000	74136000	58178000	49267000	49111000	64278000
11.245	896.771	597.736	LIPID-P-1094	TG(18:1/18:2/18:3)	TG	2155600	2628500	2869700	2766800	17450000	29806000	24251000	18257000	16282000	14387000	19921000	18188000
11.265	896.771	601.736	LIPID-P-1095	TG(14:0/18:3/22:3)	TG	2428400	2567500	4713400	4167900	22789000	34294000	26369000	24888000	18555000	15255000	19669000	22810000
11.28	896.771	573.736	LIPID-P-1096	TG(14:0/20:3/20:3)	TG	506340	452590	568760	618080	643380	894890	1152000	759940	513780	607250	602070	599570
11.41	896.771	575.736	LIPID-P-1099	TG(14:0/20:2/20:4)	TG	41059000	49930000	52847000	41946000	48343000	73034000	40138000	42042000	34720000	45223000	41137000	47105000
11.41	896.771	623.736	LIPID-P-1100	TG(16:0/16:1/22:5)	TG	7094700	8197100	8398700	8776700	9130100	15406000	10285000	8907700	7888400	9106600	8673400	9861700
11.655	924.802	601.768	LIPID-P-1102	TG(18:0/18:3/20:3)	TG	1958700	1642200	1908700	1953100	19735000	15331000	15463000	16604000	13010000	8652300	9949300	11049000
11.67	924.802	597.768	LIPID-P-1103	TG(14:0/20:1/22:5)	TG	72422	54002	43195	60406	435940	573450	415770	402420	310400	237990	403420	542140
11.69	924.802	627.768	LIPID-P-1104	TG(18:2/18:3/20:1)	TG	1882600	1655000	1034700	1465000	10221000	9871900	5980700	9428400	6550600	4376300	6563700	7497100
11.725	924.802	575.768	LIPID-P-1105	TG(14:0/20:2/22:4)	TG	7113900	5262000	3077500	3964200	9609900	12591000	6558700	6646800	7579800	5520400	7260600	9987500
11.755	924.802	603.768	LIPID-P-1106	TG(14:0/20:4/22:2)	TG	5924000	6287800	8191300	8067700	33539000	29788000	19418000	19802000	16055000	16240000	15169000	17380000
11.775	924.802	625.768	LIPID-P-1107	TG(18:1/18:3/20:2)	TG	2990800	1844700	1375200	1854500	8693300	12700000	8421400	8314000	8261200	6134500	6514800	7961400
11.78	924.802	651.768	LIPID-P-1108	TG(16:0/18:3/22:3)	TG	2462400	1894200	983710	1606700	6550200	9104200	5386600	4441200	5042100	3481600	5416000	8145800
12.105	952.833	603.799	LIPID-P-1111	TG(14:0/22:2/22:4)	TG	662270	739830	528070	498740	5717300	4084800	3084700	4115900	3265600	1854700	3089200	2903900
12.115	952.833	653.799	LIPID-P-1112	TG(18:1/18:2/22:3)	TG	233160	231270	171490	181000	2418500	1399600	939790	2221100	1598800	740740	1107100	1176700
12.235	952.833	631.799	LIPID-P-1115	TG(16:0/20:4/22:2)	TG	115310	142440	115380	116500	1104500	649030	412690	676180	517560	266270	567800	676720
12.255	952.833	651.799	LIPID-P-1116	TG(18:0/20:3/20:3)	TG	102710	80884	50561	92136	297050	216620	147750	195000	140230	132110	155380	163910
10.675	866.724	571.689	LIPID-P-1119	TG(14:0/18:3/20:4)	TG	58724	92638	120190	110080	211730	688370	439580	227810	197000	169830	424990	451900
10.685	866.724	569.689	LIPID-P-1121	TG(14:0/18:2/20:5)	TG	171460	111560	133290	201260	422250	980030	550310	367700	298380	279100	340510	538170
10.695	866.724	573.689	LIPID-P-1122	TG(14:0/18:4/20:3)	TG	110520	93887	171520	154680	250970	1056800	565220	270390	309530	160880	325170	456140
10.77	866.724	547.689	LIPID-P-1123	TG(16:1/16:1/20:5)	TG	535330	306290	289120	417630	695400	1693900	1135800	567780	412220	519510	805340	845960
10.845	866.724	521.689	LIPID-P-1124	TG(14:0/16:1/22:6)	TG	695500	218230	435350	346840	679870	1038100	1237700	497750	480590	428090	455400	708900
10.945	894.755	597.721	LIPID-P-1125	TG(18:2/18:2/18:3)	TG	1869500	1868600	1766200	1697400	10447000	16922000	12843000	12238000	8295600	6543500	9314000	13524000
11.005	894.755	595.721	LIPID-P-1127	TG(18:1/18:3/18:3)	TG	166080	202640	290060	378450	1661400	3438100	2570200	1730600	1498800	852700	1236600	2021500
11.05	894.755	573.721	LIPID-P-1129	TG(14:0/20:3/20:4)	TG	4247800	5054600	4702400	6247900	4297800	8756000	5364500	4635700	3591100	3718900	4533300	5376000
11.11	894.755	547.721	LIPID-P-1130	TG(16:1/16:1/22:5)	TG	796150	450530	405320	348300	1265000	2195500	1419800	1411100	892480	731770	1157900	1331100
11.14	894.755	575.721	LIPID-P-1131	TG(14:0/20:2/20:5)	TG	13553000	9270300	8080100	13300000	15298000	40002000	25151000	16048000	12117000	13597000	18295000	14841000
11.205	894.755	549.721	LIPID-P-1133	TG(16:0/16:1/22:6)	TG	7127800	4999800	3379800	4457200	7691600	13592000	12260000	8730200	6186900	4388700	7607600	6811800
11.34	922.786	599.752	LIPID-P-1135	TG(14:0/20:3/22:4)	TG	804550	861740	882520	822160	7076300	5605900	4677500	5662300	3634100	4186300	3493700	4365100
11.39	922.786	601.752	LIPID-P-1136	TG(14:0/20:4/22:3)	TG	7144500	9239400	10347000	9427000	38567000	35145000	26254000	26570000	21540000	19372000	16030000	21756000
11.41	922.786	625.752	LIPID-P-1139	TG(18:2/18:3/20:2)	TG	2170900	1427700	1165500	1289000	5697400	7129700	4867300	4349900	4740100	4207600	3708200	6801500
11.42	922.786	575.752	LIPID-P-1140	TG(14:0/20:2/22:5)	TG	4536000	1533100	1638200	2038400	8096200	13101000	9551300	6103500	7758200	6179100	8955400	11537000
11.61	922.786	577.752	LIPID-P-1141	TG(16:0/18:1/22:6)	TG	26470000	21849000	18194000	22697000	94015000	103230000	76682000	96769000	54479000	50338000	49353000	48084000
11.705	950.818	601.783	LIPID-P-1142	TG(14:0/22:3/22:4)	TG	611560	610120	611190	728080	5152100	2422600	2514900	2895100	2876300	1970000	2231000	2148100
11.71	950.818	653.783	LIPID-P-1143	TG(18:2/18:2/22:3)	TG	199670	161520	150800	142130	959810	750140	600150	789750	797890	481610	454940	635980
11.735	950.818	651.783	LIPID-P-1144	TG(18:1/18:3/22:3)	TG	372040	380470	302780	279240	3920800	3278700	2165700	2912400	1961800	1471600	2135000	2342400
11.815	950.818	629.783	LIPID-P-1145	TG(16:0/20:4/22:3)	TG	260450	326150	249900	415300	833250	698150	465470	409080	528360	499460	496810	443460
11.87	950.818	605.783	LIPID-P-1147	TG(18:0/18:1/22:6)	TG	593180	672820	767950	666890	4364400	3432300	2109900	3865500	1917100	2755600	1833700	2059000
11.89	950.818	603.783	LIPID-P-1149	TG(18:0/18:2/22:5)	TG	341610	198700	148060	148710	3796400	3149700	2447100	4235100	2929100	2584300	2356700	2395100
10.715	892.739	597.705	LIPID-P-1152	TG(18:2/18:3/18:3)	TG	170140	112830	227470	269410	716660	1978900	1330100	938660	676600	583190	1006600	1312100
10.8	892.739	573.705	LIPID-P-1155	TG(14:0/20:3/20:5)	TG	1372700	1139500	868940	1477600	1466400	4205500	2966300	1691100	1315400	1195500	1522000	2113700
10.8	892.739	621.705	LIPID-P-1156	TG(16:1/16:1/22:6)	TG	361090	289670	208640	275890	245520	789810	519900	295090	211160	166560	335430	405760
10.88	892.739	647.705	LIPID-P-1157	TG(14:0/20:4/20:4)	TG	162440	163060	40714	55137	189760	324050	212740	149410	126800	121130	169290	186240
10.885	892.739	547.705	LIPID-P-1158	TG(14:0/18:2/22:6)	TG	3616600	2769400	774910	1345300	3995000	6761300	5098200	2782300	2458400	2590100	3342500	3558400
11.045	920.771	597.736	LIPID-P-1159	TG(14:0/20:3/22:5)	TG	128260	174250	150010	161750	790080	1003900	769280	685070	519760	453630	443960	694960
11.07	920.771	599.736	LIPID-P-1160	TG(14:0/20:4/22:4)	TG	2982500	3596400	4078400	6292300	12511000	15312000	7887200	8954500	7751400	9786200	4789100	8285800
11.125	920.771	601.736	LIPID-P-1161	TG(14:0/20:5/22:3)	TG	1875400	1554100	2144100	2614800	14533000	16530000	14405000	11161000	7612400	7773700	7247200	7256000
11.16	920.771	621.736	LIPID-P-1163	TG(18:1/18:3/20:4)	TG	518250	439240	570360	728120	2560500	2098900	3039000	2207300	1407000	1611400	1480900	1779100
11.175	920.771	623.736	LIPID-P-1164	TG(18:2/18:3/20:3)	TG	4468700	1812600	1709700	2126300	5077200	8354300	5417300	5116500	3809600	3785800	3389700	4260000
11.265	920.771	647.736	LIPID-P-1165	TG(16:0/18:3/22:5)	TG	3116900	2184200	2130400	2508200	5319000	6623400	4699100	5714600	3365500	3295500	3085300	3247500
11.265	920.771	575.736	LIPID-P-1166	TG(14:0/20:2/22:6)	TG	68842000	33463000	25785000	41858000	98716000	114470000	91019000	91098000	62428000	61673000	57903000	60410000
11.36	948.802	599.768	LIPID-P-1167	TG(14:0/22:4/22:4)	TG	265110	201270	159190	253870	1324200	1067800	755390	1004200	949330	699970	685510	896030
11.38	948.802	651.768	LIPID-P-1168	TG(18:2/18:3/22:3)	TG	392900	177670	135930	183170	2358500	1763000	994430	917750	1052800	937850	862000	869190
11.47	948.802	601.768	LIPID-P-1170	TG(14:0/22:3/22:5)	TG	633670	185610	270040	316680	4580700	4341100	2573200	2513300	2223100	2122600	1851400	2750700
11.565	948.802	649.768	LIPID-P-1172	TG(18:1/18:3/22:4)	TG	346560	193490	265160	263720	2203400	1710500	1797200	2375100	1439600	952720	969850	785020
11.61	948.802	603.768	LIPID-P-1173	TG(14:0/22:2/22:6)	TG	5363900	3502800	3644700	4017200	30473000	21877000	20510000	23776000	14734000	14016000	12161000	12261000
11.71	948.802	647.768	LIPID-P-1174	TG(18:0/20:4/20:4)	TG	183740	227790	218100	274780	291150	279300	243080	357320	213180	264770	167280	139550
10.69	890.724	591.689	LIPID-P-1176	TG(18:1/18:4/18:4)	TG	228600	507990	265150	202030	1218400	7744700	3889400	1939100	3060400	836300	4737100	4288300
10.845	918.755	599.721	LIPID-P-1178	TG(14:0/20:5/22:4)	TG	1197900	1725700	933520	1542100	4675200	6693600	4466400	3864600	2290000	3323700	2051000	3281200
10.865	918.755	621.721	LIPID-P-1179	TG(18:2/18:3/20:4)	TG	831070	1106500	336750	816650	2034700	3575400	2007300	1636700	865990	1039300	850480	1206800
10.905	918.755	647.721	LIPID-P-1180	TG(16:1/20:4/20:4)	TG	361480	367040	115760	194790	268860	680820	424740	416630	246150	179140	298330	351800
10.935	918.755	573.721	LIPID-P-1182	TG(14:0/20:3/22:6)	TG	6523800	7565100	2910800	3892200	7164100	12072000	9990000	8043000	5777400	4647600	6139700	7947600
11.21	946.786	649.752	LIPID-P-1184	TG(18:2/18:3/22:4)	TG	392140	224970	212130	337880	1802700	1454600	1363600	1766500	1230800	1004000	586030	621430
11.25	946.786	601.752	LIPID-P-1185	TG(14:0/22:3/22:6)	TG	7952200	5057900	4922900	6585700	40015000	30599000	30201000	42116000	24313000	19560000	14843000	15652000
11.25	946.786	647.752	LIPID-P-1186	TG(18:1/18:3/22:5)	TG	563750	324800	413950	456500	2421000	1772500	1639600	2246800	1464100	1122100	861700	754910
11.315	946.786	673.752	LIPID-P-1188	TG(16:0/20:4/22:5)	TG	37218	38507	34578	35134	95519	75934	44481	64288	50090	63264	43010	68173
11.66	974.818	629.783	LIPID-P-1189	TG(18:0/20:3/22:6)	TG	256660	89577	76510	157620	1268400	748220	824950	1197500	530760	478460	460830	630310
10.45	888.708	591.674	LIPID-P-1190	TG(18:2/18:4/18:4)	TG	231790	216000	141770	161440	614690	3117400	1834300	826780	1322700	512700	1904100	1907300
10.61	916.739	597.705	LIPID-P-1191	TG(18:2/18:3/20:5)	TG	155300	104250	120290	185830	382570	1013200	598430	435840	227190	316260	250910	433410
10.685	916.739	571.705	LIPID-P-1193	TG(14:0/20:4/22:6)	TG	245680	162640	157680	218190	406950	787170	581520	458850	272340	272800	264460	394460
10.69	916.739	595.705	LIPID-P-1194	TG(16:1/20:4/20:5)	TG	62103	81812	55512	65667	44545	198190	85570	79784	69500	57322	32000	54112
10.945	944.771	647.736	LIPID-P-1195	TG(18:2/18:3/22:5)	TG	508230	341400	216520	599130	1952800	1661500	1291600	1721800	938990	1176800	676450	603720
11.015	944.771	625.736	LIPID-P-1198	TG(16:0/20:5/22:5)	TG	212750	216900	191980	226610	697490	876520	525320	319320	325030	381470	267360	452470
11.05	944.771	623.736	LIPID-P-1199	TG(16:0/20:4/22:6)	TG	469610	447740	657060	562440	488710	397360	296030	374780	290910	416300	149510	347580
11.39	972.802	627.768	LIPID-P-1200	TG(18:0/20:4/22:6)	TG	74682	67462	56380	98069	1576400	965150	914710	1477000	662310	609040	390690	555050
